# Supplementary material for: About the effects of polarising optics on lidar signals and the Δ90-calibration
Source: Copernicus journal article supplement (doi:10.5194/amt-2015-338), 2016-02-11
Supplement: Supplementary file 1 [file amt-2015-338-supplement.pdf]

## 1 Supplement

### 2 S.1 Coordinate system and conventions

3 Müller matrices describe the effect of optical elements on the Stokes vector with respect to a  
4 coordinate system and using a set of definitions about signs and directions. Different sets of  
5 definitions can be found in the literature as discussed in detail in Muller (1969); some of  
6 which are even inconsistent. The discussions led to the so-called *Muller (or Muller-  
7 Nebraska-) convention*, which we follow in this paper (see also Hauge et al. (1980)). We use a  
8 right-handed Cartesian coordinate system (see Fig. 7), in which angles are defined counter-  
9 clock wise, i.e. from the x- to the y-axis, when looking against the z-axis. The local z-axis  
10 points in the propagation direction of the light. We define the reference coordinate system of  
11 the lidar setup by the orientation of the polarising beam-splitter (PBS) in the receiving optics.  
12 Light polarised with its E-vector on the x-axis, i.e. parallel to the incident plane of the PBS in  
13 Fig. 6, is mostly transmitted by a usual PBS, while light with polarisation in y-direction, i.e.  
14 perpendicularly polarised to the incident plane, is mostly reflected. The incident plane is  
15 spanned up by the direction of light propagation (z-axis, propagation vector  $\mathbf{k}$ ) and the normal  
16 of the reflecting surface, which means that the incident plane in Fig. 6 is the x-z-plane). The  
17 parallel and perpendicular polarisations are also called the p- and s-polarisation, respectively.  
18 *The orientation of linearly polarised light is defined by the orientation of the plane of  
19 vibration, which contains both the electric vector  $E$  and the propagation vector  $\mathbf{k}$ .*

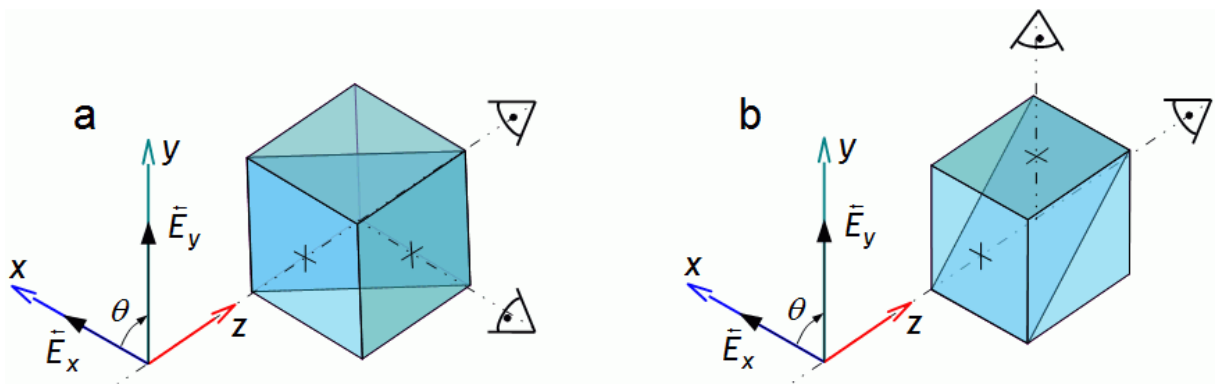

20 Fig. 6 Definition of the reference coordinate system with respect to the incidence plane of the  
21 polarising beam-splitter.

1 Other Müller matrix measurement configurations may have other arrangements for the  
 2 coordinates. All choices, however, are arbitrary, and lead to different Müller matrices  
 3 Chipman (2009b). There is no preferred set of definitions in the literature. According to our  
 4 choice of orientation, the diattenuation parameter  $D$  is defined as

$$D_T = \frac{T_T^p - T_T^s}{T_T^p + T_T^s}, \quad \Delta_T = \Delta_T^p - \Delta_T^s,$$

$$D_R = \frac{T_R^p - T_R^s}{T_R^p + T_R^s}, \quad \Delta_R = \Delta_R^p - \Delta_R^s$$

5 In order to keep the results of the Müller matrix calculations consistent when adding  
 6 reflecting surfaces as mirrors and beam-splitters in the optical setup, a right-handed xyz-  
 7 coordinate system is used with the z-axis in the direction of the light propagation. The vertical  
 8 (perpendicular) polarised light has its E-vector in y-direction,

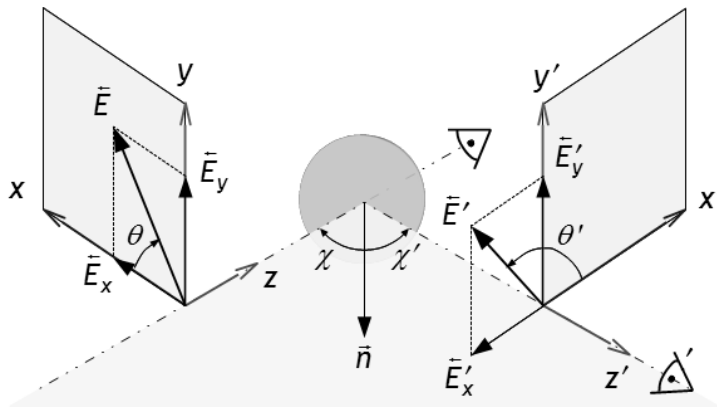

9 Fig. 7 Reflection of a Stokes vector.

## 10 S.2 Stokes vector and Müller matrix

11 The Stokes vector and the Müller matrix are one representation of the state of polarisation of  
 12 light, which is based on measurable quantities. The Stokes vector describes the polarisation  
 13 state of a light beam, and the Müller matrix describes how the Stokes vector changes when  
 14 passing through an optical volume, which can be an optical element or an atmospheric path  
 15 with scattering, absorbing and refracting properties. A Stokes vector can be determined by six  
 16 measurements of the flux  $I$  with ideal linear and circular polarisation analysers at different  
 17 orientations before a detector Chipman (2009a; Ch. 15.17)

$I^p$  parallel (horizontal) linear polarizer ( $0^\circ$ )

$I^s$  perpendicular (vertical) linear polarizer ( $90^\circ$ )

$I^{45}$   $45^\circ$  linear polarizer

$I^{135}$   $135^\circ$  linear polarizer

$I^R$  right circular polarizer

$I^L$  left circular polarizer

(S.2.1)

2 The Stokes vector is defined as

$$3 \begin{pmatrix} I \\ Q \\ U \\ V \end{pmatrix} = \begin{pmatrix} I^p + I^s \\ I^p - I^s \\ I^{45} - I^{135} \\ I^R - I^L \end{pmatrix} \quad (S.2.2)$$

4 Right-circularly polarised light is defined as a clockwise rotation of the electric vector when  
5 the observer is looking against the direction of light propagation Bennett (2009a) (see Fig.  
6 X ). Another representation, the so-called modified Stokes column vector Mishchenko et al.  
7 (2002) , uses the horizontally (parallel,  $p$ ) and vertically (perpendicular,  $s$ ) polarised fluxes  $I_p$   
8 and  $I_s$  as the first two Stokes parameters. They can be transformed from the Stokes vector with  
9 a transformation matrix

$$10 \begin{pmatrix} I_p \\ I_s \\ U \\ V \end{pmatrix} = \mathbf{A} \begin{pmatrix} I \\ Q \\ U \\ V \end{pmatrix} = \begin{pmatrix} 0.5 & 0.5 & 0 & 0 \\ 0.5 & -0.5 & 0 & 0 \\ 0 & 0 & 1 & 0 \\ 0 & 0 & 0 & 1 \end{pmatrix} \begin{pmatrix} I \\ Q \\ U \\ V \end{pmatrix} \Rightarrow \begin{matrix} I_p = 0.5(I + Q) \\ I_s = 0.5(I - Q) \end{matrix} \quad (S.2.3)$$

11 and vice versa

$$12 \begin{pmatrix} I \\ Q \\ U \\ V \end{pmatrix} = \mathbf{A}^{-1} \begin{pmatrix} I_p \\ I_s \\ U \\ V \end{pmatrix} = \begin{pmatrix} 1 & 1 & 0 & 0 \\ 1 & -1 & 0 & 0 \\ 0 & 0 & 1 & 0 \\ 0 & 0 & 0 & 1 \end{pmatrix} \begin{pmatrix} I_p \\ I_s \\ U \\ V \end{pmatrix} \quad (S.2.4)$$

13 For fully polarised light, the Stokes parameters fulfil the equation

$$14 I^2 = Q^2 + U^2 + V^2 \quad (S.2.5)$$

15 and for full linearly polarised light

$$16 I^2 = Q^2 + U^2 \quad (S.2.6)$$

### 1 S.3 Depolarisation

2 Depolarisation is closely related to scattering and usually has its origins from retardance or  
 3 diattenuation which is rapidly varying in time, wavelength, or spatially over an optical device  
 4 (Cornu-, Lyot-, or wedge-depolariser). Depolarisation causes a loss of coherence of the  
 5 polarisation state Chipman (2009a). The polarisation vector  $\mathbf{I}_F$  reflected by the atmosphere  
 6  $\mathbf{F}(a)$  with linear polarisation parameter  $a$  from a generally polarised laser  $\mathbf{I}_L$  is (Sect. 5.32 of  
 7 van de Hulst (1981); Sect. 4 of Mishchenko et al. (2002)).

$$8 \quad \frac{\mathbf{I}_F(a)}{F_{11}T_E I_L} = \frac{\mathbf{F}(a)|\mathbf{M}_E \mathbf{I}_L\rangle}{F_{11}T_E I_L} = \begin{pmatrix} 1 & 0 & 0 & 0 \\ 0 & a & 0 & 0 \\ 0 & 0 & -a & 0 \\ 0 & 0 & 0 & 1-2a \end{pmatrix} \begin{pmatrix} i_E \\ q_E \\ u_E \\ v_E \end{pmatrix} = \begin{pmatrix} i_E \\ a q_E \\ -a u_E \\ (1-2a)v_E \end{pmatrix} \quad (\text{S.3.1})$$

9 The linear depolarisation ratio is defined as

$$10 \quad \delta = \frac{F_{11} - F_{22}}{F_{11} + F_{22}} = \frac{1-a}{1+a} \Rightarrow a = \frac{1-\delta}{1+\delta} \quad (\text{S.3.2})$$

11 With a linearly polarised laser with intensity  $I_L$  and linear polarisation parameter  $a_L$  and  
 12 rotational misalignment  $\alpha$ , i.e. without emitter optics, the laser light reflected by the  
 13 atmosphere with linear polarisation parameter  $a$  is

$$14 \quad \frac{\mathbf{I}_F(a, \alpha, a_L)}{F_{11} I_L} = \frac{\mathbf{F}(a)|\mathbf{I}_L(\alpha, a_L)\rangle}{F_{11} I_L} = \begin{pmatrix} 1 & 0 & 0 & 0 \\ 0 & a & 0 & 0 \\ 0 & 0 & -a & 0 \\ 0 & 0 & 0 & 1-2a \end{pmatrix} \begin{pmatrix} 1 \\ a_L c_{2\alpha} \\ a_L s_{2\alpha} \\ 0 \end{pmatrix} = \begin{pmatrix} 1 \\ a a_L c_{2\alpha} \\ -a a_L s_{2\alpha} \\ 0 \end{pmatrix} \quad (\text{S.3.3})$$

15 It is obvious that the lasers  $a_L$  and the atmospheres  $a$  cannot be discerned in the resulting  
 16 Stokes vector, and the measured, combined polarisation parameter is

$$17 \quad a' = a a_L \quad (\text{S.3.4})$$

18 The linear depolarisation ratio  $\delta'$  resulting from  $a'$  can be retrieved with Eq. (12)

$$19 \quad \delta' = \frac{1-a'}{1+a'} = \frac{\delta + \delta_L}{1 + \delta \delta_L} \quad (\text{S.3.5})$$

20 For a small linear depolarisation ratio  $\delta_L$  of the laser beam, the resulting linear depolarisation  
 21 ratio of an atmospheric measurement is about the sum of the lasers and the atmospheres linear  
 22 depolarisation ratios

$$1 \quad \delta_L \ll 1 \Rightarrow \delta' \approx \delta + \delta_L \quad (\text{S.3.6})$$

2 If  $\delta_L$  is unknown, the uncertainty will cause an absolute error of the finally retrieved  
3 atmospheric linear depolarisation ratio.

#### 4 **S.4 Retarding linear diattenuator**

5 The diattenuation magnitude  $D^*$  of an optical element, usually simply *diattenuation*, is  
6 calculated from the maximum and minimum transmitted intensities  $I$  (or transmittances  $T$ )  
7 (Chipman, 2009b), measured by rotating a linear polarising analyser in front of the element:

$$8 \quad D^* = \frac{I_{\max} - I_{\min}}{I_{\max} + I_{\min}} = \frac{T_{\max} - T_{\min}}{T_{\max} + T_{\min}} \quad (\text{S.4.1})$$

9 The diattenuation magnitude  $D^*$  is always positive, and if  $D^*$  is deduced. from the  
10 reflectances  $T_R^p$  and  $T_R^s$  of an optical sample as in Eq. (17), Eq. (S.4.1) becomes Lu and  
11 Chipman (1996)

$$12 \quad D_R^* \equiv \left| \frac{T_R^p - T_R^s}{T_R^p + T_R^s} \right| \quad (\text{S.4.2})$$

13 In order to avoid sign changes in the equations between the cases where  $T_R^p < T_R^s$  and  $T_R^p >$   
14  $T_R^s$ , we use instead the diattenuation parameter  $D_S$  (Eq. (S.4.3)) (see Chipman (2009b), where  
15 it is named  $d_x$  or  $d_h$ ), with which all equations can be expressed together for the transmitting  
16 (subscript  $S = T$ ) and the reflecting (subscript  $S = R$ ) part of a polarising beam-splitter.

$$17 \quad D_S \in \{D_T, D_R\}, \quad D_R \equiv \frac{T_R^p - T_R^s}{T_R^p + T_R^s}, \quad D_T \equiv \frac{T_T^p - T_T^s}{T_T^p + T_T^s} \quad (\text{S.4.3})$$

18 The transmittances for unpolarised light are shown in Eq. (S.4.4), and some often occurring  
19 expressions in Eqs. (S.4.5) and (S.4.6).

$$20 \quad T_R \equiv \frac{T_R^p + T_R^s}{2}, \quad T_T \equiv \frac{T_T^p + T_T^s}{2} \quad (\text{S.4.4})$$

$$21 \quad 1 - D_R = T_R^s / T_R, \quad 1 + D_R = T_R^p / T_R, \quad 1 - D_T = T_T^s / T_T, \quad 1 + D_T = T_T^p / T_T \quad (\text{S.4.5})$$

$$22 \quad \frac{T_R^s}{T_R^p} = \frac{1 - D_R}{1 + D_R}, \quad \frac{T_T^s}{T_T^p} = \frac{1 - D_T}{1 + D_T} \quad (\text{S.4.6})$$

23 The optical elements considered here are non-depolarising, linear diattenuators  $\mathbf{M}_D$ , with  
24 linear diattenuation parameter  $D_O$  and average transmission  $T_O$  for unpolarised light,

1 combined with linear retarders  $\mathbf{M}_{Ret}$  (linear retardance  $\Delta_o$ ,  $\cos\Delta_o = c_o$ ,  $\sin\Delta_o = s_o$ ). The optical  
 2 elements with possibly considerable diattenuation and retardation are dichroic beam-splitters,  
 3 which are used to separate the wavelengths and to analyse the state of polarisation of the  
 4 collimated beam in the receiver optics. They are used in transmission and reflection. The  
 5 matrix of the transmitting part is Eq. (S.4.7) (see Eqs. (14, 15))

$$\begin{aligned}
 \mathbf{M}_T &= \frac{1}{2} \begin{pmatrix} T_T^p + T_T^s & T_T^p - T_T^s & 0 & 0 \\ T_T^p - T_T^s & T_T^p + T_T^s & 0 & 0 \\ 0 & 0 & 2\sqrt{T_T^p T_T^s} \cos \Delta_T & 2\sqrt{T_T^p T_T^s} \sin \Delta_T \\ 0 & 0 & -2\sqrt{T_T^p T_T^s} \sin \Delta_T & 2\sqrt{T_T^p T_T^s} \cos \Delta_T \end{pmatrix} = \\
 &= T_T \begin{pmatrix} 1 & D_T & 0 & 0 \\ D_T & 1 & 0 & 0 \\ 0 & 0 & Z_T c_T & Z_T s_T \\ 0 & 0 & -Z_T s_T & Z_T c_T \end{pmatrix}
 \end{aligned} \tag{S.4.7}$$

$$Z_T \equiv \frac{2\sqrt{T_T^p T_T^s}}{T_T^p + T_T^s} = \sqrt{1 - D_T^2}, \quad c_T \equiv \cos \Delta_T, \quad s_T \equiv \sin \Delta_T, \quad \Delta_T \equiv \varphi_T^p - \varphi_T^s \tag{S.4.8}$$

8 with the shortcuts in Eq. (S.4.8), the intensity transmission coefficients (transmittance) for  
 9 light polarised parallel ( $T_T^p$ ) and perpendicular ( $T_T^s$ ) to the plane of incidence of the PBS, the  
 10 diattenuation parameter  $D_T$  (see S.3), and the average transmittance  $T_T$  for unpolarised light.  
 11  $\Delta_T$  is the difference of the phase shifts of the parallel and perpendicular polarised electrical  
 12 fields. The Müller matrix for the reflecting part of the PBS (see Eqs. 16,17) includes a mirror  
 13 reflection (S.6):

$$\mathbf{M}_R = T_R \begin{pmatrix} 1 & D_R & 0 & 0 \\ D_R & 1 & 0 & 0 \\ 0 & 0 & -Z_R c_R & -Z_R s_R \\ 0 & 0 & Z_R s_R & -Z_R c_R \end{pmatrix} = T_R \begin{pmatrix} 1 & 0 & 0 & 0 \\ 0 & 1 & 0 & 0 \\ 0 & 0 & -1 & 0 \\ 0 & 0 & 0 & -1 \end{pmatrix} \begin{pmatrix} 1 & D_R & 0 & 0 \\ D_R & 1 & 0 & 0 \\ 0 & 0 & Z_R c_R & Z_R s_R \\ 0 & 0 & -Z_R s_R & Z_R c_R \end{pmatrix} \tag{S.4.9}$$

15 with the corresponding intensity reflection coefficients (reflectance) for light polarised  
 16 parallel ( $T_R^p$ ) and perpendicular ( $T_R^s$ ) to the plane of incidence of the PBS

$$Z_R \equiv \frac{2\sqrt{T_R^p T_R^s}}{T_R^p + T_R^s} = \sqrt{1 - D_R^2}, \quad c_R \equiv \cos \Delta_R, \quad s_R \equiv \sin \Delta_R, \quad \Delta_R \equiv \varphi_R^p - \varphi_R^s \tag{S.4.10}$$

1 In order to simplify the derivation of the equations, we write in the following for both, the  
 2 reflecting and transmitting matrix of the polarising beam-splitter,  $\mathbf{M}_S$  (subscript  $S$  for splitter)  
 3 where appropriate.

$$4 \quad Z_S \in \{-Z_R, Z_T\}, \quad \mathbf{M}_S \in \{\mathbf{M}_R, \mathbf{M}_T\}, \quad I_S \in \{I_R, I_T\} \quad (\text{S.4.11})$$

5 eigen-polarisations along the x and y axes

$$6 \quad \mathbf{M}_O = \mathbf{M}_D \mathbf{M}_{ret} = T_O \begin{pmatrix} 1 & D_O & 0 & 0 \\ D_O & 1 & 0 & 0 \\ 0 & 0 & Z_O & 0 \\ 0 & 0 & 0 & Z_O \end{pmatrix} \begin{pmatrix} 1 & 0 & 0 & 0 \\ 0 & 1 & 0 & 0 \\ 0 & 0 & c_O & s_O \\ 0 & 0 & -s_O & c_O \end{pmatrix} = T_O \begin{pmatrix} 1 & D_O & 0 & 0 \\ D_O & 1 & 0 & 0 \\ 0 & 0 & Z_O c_O & Z_O s_O \\ 0 & 0 & -Z_O s_O & Z_O c_O \end{pmatrix} \quad (\text{S.4.12})$$

7 As both are linear, they commute (Eq. (S.4.13)). They have a block-diagonal structure.

$$8 \quad \mathbf{M}_O = \mathbf{M}_D \mathbf{M}_{ret} = \mathbf{M}_{ret} \mathbf{M}_D \quad (\text{S.4.13})$$

9 Among such optical elements are  $\lambda/4$  plates (Sect. S.10.16),  $\lambda/2$  plates (Sect. S.10.13),  
 10 dichroic beam-splitters, polarising beam-splitters, polarising sheet filters, aluminium and  
 11 dielectric mirrors, and also uncoated glass surfaces under oblique incident angles. For further  
 12 information see Azzam (2009); Bennett (2009a,b); Chipman (2009b,a)

## 13 **S.5 Rotation**

### 14 **S.5.1 Rotation about the direction of light propagation**

15 Some confusion can arise because rotation about the optical axis can be done on a Stokes  
 16 vector, on the coordinate system (coordinate transformation), and on an optical element while  
 17 keeping the reference coordinate system. The first two rotations don't change the state of the  
 18 circular polarisation, while a rotated optical element can do that. Additional confusion arises  
 19 because often in the literature and in textbooks the vector and coordinate rotations are mixed,  
 20 or the derivation of the presented final equations from first principles are not provided, and  
 21 sometimes the explanatory text is misleading or inconsistent. We follow the notations in  
 22 Mishchenko et al. (2002); Chipman (2009b). Rotations are anti-clockwise, from the x-axis  
 23 towards the y-axis, seen against the direction of light propagation (z-axis).

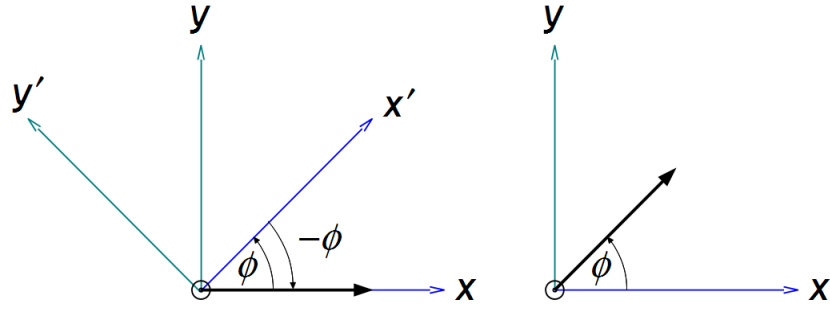

1 Fig. 8 Rotation of the  $xy$ -coordinate system (left) and of a vector (right). The  $z$ -axis, i.e. the  
 2 direction of light propagation, points out of the paper plane.

3 A Stokes vector which is physically rotated by an angle  $\phi$  while the coordinate system is fixed  
 4 becomes Mishchenko et al. (2002; Ch. 1.5)

$$5 \quad \mathbf{I}(\phi) = \mathbf{R}(\phi) \begin{pmatrix} I \\ Q \\ U \\ V \end{pmatrix} = \begin{pmatrix} 1 & 0 & 0 & 0 \\ 0 & c_{2\phi} & -s_{2\phi} & 0 \\ 0 & s_{2\phi} & c_{2\phi} & 0 \\ 0 & 0 & 0 & 1 \end{pmatrix} \begin{pmatrix} I \\ Q \\ U \\ V \end{pmatrix} = \begin{pmatrix} I \\ c_{2\phi}Q - s_{2\phi}U \\ s_{2\phi}Q + c_{2\phi}U \\ V \end{pmatrix} \quad (\text{S.5.1.1})$$

6 with the rotation matrix  $\mathbf{R}(\alpha)$  and the abbreviations

$$7 \quad c_{2\phi} \equiv \cos 2\phi, \quad s_{2\phi} \equiv \sin 2\phi, \quad (\text{S.5.1.2})$$

8 and

$$9 \quad \mathbf{R}(\phi) = \begin{pmatrix} 1 & 0 & 0 & 0 \\ 0 & c_{2\phi} & -s_{2\phi} & 0 \\ 0 & s_{2\phi} & c_{2\phi} & 0 \\ 0 & 0 & 0 & 1 \end{pmatrix} \quad (\text{S.5.1.3})$$

$$10 \quad \mathbf{R}(90^\circ + \phi) = \begin{pmatrix} 1 & 0 & 0 & 0 \\ 0 & -c_{2\phi} & s_{2\phi} & 0 \\ 0 & -s_{2\phi} & -c_{2\phi} & 0 \\ 0 & 0 & 0 & 1 \end{pmatrix} \quad (\text{S.5.1.4})$$

$$11 \quad \mathbf{R}(\pm 45^\circ + \varepsilon) = \mathbf{R}(x45^\circ + \varepsilon) = \mathbf{R}(x, \varepsilon) = \begin{pmatrix} 1 & 0 & 0 & 0 \\ 0 & -x s_{2\varepsilon} & -x c_{2\varepsilon} & 0 \\ 0 & x c_{2\varepsilon} & -x s_{2\varepsilon} & 0 \\ 0 & 0 & 0 & 1 \end{pmatrix} \quad (\text{S.5.1.5})$$

12 With these definitions a formula for one rotation can easily be converted to other angles with



$$\begin{aligned}
& \Psi \quad \rightarrow \quad 0^\circ + \varepsilon \quad \leftrightarrow \quad \pm 45^\circ + \varepsilon \\
& \mathbf{R}(\Psi) \quad \rightarrow \quad \mathbf{R}(\varepsilon) \quad \leftrightarrow \quad \mathbf{R}(x45^\circ + \varepsilon) \\
1 \quad & \begin{pmatrix} 1 & 0 & 0 & 0 \\ 0 & c_{2\Psi} & -s_{2\Psi} & 0 \\ 0 & s_{2\Psi} & c_{2\Psi} & 0 \\ 0 & 0 & 0 & 1 \end{pmatrix} \rightarrow \begin{pmatrix} 1 & 0 & 0 & 0 \\ 0 & c_{2\varepsilon} & -s_{2\varepsilon} & 0 \\ 0 & s_{2\varepsilon} & c_{2\varepsilon} & 0 \\ 0 & 0 & 0 & 1 \end{pmatrix} \leftrightarrow \begin{pmatrix} 1 & 0 & 0 & 0 \\ 0 & -xs_{2\varepsilon} & -xc_{2\varepsilon} & 0 \\ 0 & xc_{2\varepsilon} & -xs_{2\varepsilon} & 0 \\ 0 & 0 & 0 & 1 \end{pmatrix} \quad (S.5.1.6) \\
& c_{2\Psi} \quad \rightarrow \quad c_{2\varepsilon} \quad \leftrightarrow \quad -xs_{2\varepsilon} \\
& s_{2\Psi} \quad \rightarrow \quad s_{2\varepsilon} \quad \leftrightarrow \quad xc_{2\varepsilon}
\end{aligned}$$

2 Please note, that in Mishchenko et al. (2002; Ch. 1.5) the equations describe a rotation of the  
3 Stokes vector, while the text specifies the transformation as "rotation of the two-dimensional  
4 coordinate system". The two transformations are called "alibi" and "alias" transformation  
5 Steinborn and Ruedenberg (1973), respectively. The Stokes vector rotates contra-variantly  
6 under the change of basis. If we rotate the coordinate system (alias transformation) by an  
7 angle  $\phi$  (see Fig. 8), the original Stokes vector  $\mathbf{I}$  appears in the rotated coordinate system  
8 under the angle  $-\phi$ , and the Stokes vector  $\mathbf{I}'$  in the rotated coordinate system is Eq. (S.5.1.7).

$$9 \quad \mathbf{I}' = \begin{pmatrix} I' \\ Q' \\ U' \\ V' \end{pmatrix} = \mathbf{R}(-\phi) \mathbf{I} = \begin{pmatrix} 1 & 0 & 0 & 0 \\ 0 & c_{2\phi} & s_{2\phi} & 0 \\ 0 & -s_{2\phi} & c_{2\phi} & 0 \\ 0 & 0 & 0 & 1 \end{pmatrix} \begin{pmatrix} I \\ Q \\ U \\ V \end{pmatrix} = \begin{pmatrix} I \\ c_{2\phi} Q + s_{2\phi} U \\ -s_{2\phi} Q + c_{2\phi} U \\ V \end{pmatrix} \quad (S.5.1.7)$$

10 The rotation of the polarisation of a Stokes vector can be accomplished by means of a  $\lambda/2$   
11 plate (HWP), which is a  $180^\circ$  linear retarder. An ideal HWP can be derived from Eq. (S.5.2.3)  
12 by setting  $\Delta_\theta = 180^\circ$ ,  $D_\theta = 0 \Rightarrow Z_\theta = 1$  and  $W_\theta = 2$ , and  $T_\theta = 1$ :

$$13 \quad \mathbf{M}_{HWP}(\phi) = \begin{pmatrix} 1 & 0 & 0 & 0 \\ 0 & 1 - 2s_{2\phi}^2 & 2s_{2\phi}c_{2\phi} & 0 \\ 0 & 2s_{2\phi}c_{2\phi} & 1 - 2c_{2\phi}^2 & 0 \\ 0 & 0 & 0 & -1 \end{pmatrix} = \begin{pmatrix} 1 & 0 & 0 & 0 \\ 0 & c_{4\phi} & s_{4\phi} & 0 \\ 0 & s_{4\phi} & -c_{4\phi} & 0 \\ 0 & 0 & 0 & -1 \end{pmatrix} = \\
= \mathbf{R}(2\phi) \begin{pmatrix} 1 & 0 & 0 & 0 \\ 0 & 1 & 0 & 0 \\ 0 & 0 & -1 & 0 \\ 0 & 0 & 0 & -1 \end{pmatrix} \quad (S.5.1.8)$$

14 A HWP rotates a Stokes vector by twice the own rotation and additionally changes the  
15 direction of the circularly polarised component. For a rotation of  $\phi = 90^\circ$  the HWP acts as a

1 mirror but without changing the direction of light propagation. Real HWPs are often made of  
 2 birefringent crystals. Their retardance depends in general on the wavelength, on the incident  
 3 angle, and on the temperature. For lidar applications so-called true zero-order HWPs are best  
 4 suited. The HWP rotator and the mechanical rotator can be combined in one matrix  $\mathbf{M}_{rot}$  as  
 5 shown in S.10.15.

### 6 **S.5.2 Rotation of a retarding diattenuator**

7 The rotation of an optical element with Müller matrix  $\mathbf{M}_O$  by an angle  $\phi$  about the direction of  
 8 light propagation is mathematically performed by first rotating the coordinate system before  
 9  $\mathbf{M}_O$  by  $-\phi$ , to achieve the description of the Stokes vector in the local coordinate system  
 10 (eigen-polarisations) of  $\mathbf{M}_O$ , and then rotating the coordinate system behind  $\mathbf{M}_O$  back to the  
 11 reference coordinate system by  $\phi$  using the rotation matrix  $\mathbf{R}(\phi)$

$$12 \quad \mathbf{M}_O(\phi) = \mathbf{R}(\phi)\mathbf{M}_O(0^\circ)\mathbf{R}(-\phi), \quad (S.5.2.1)$$

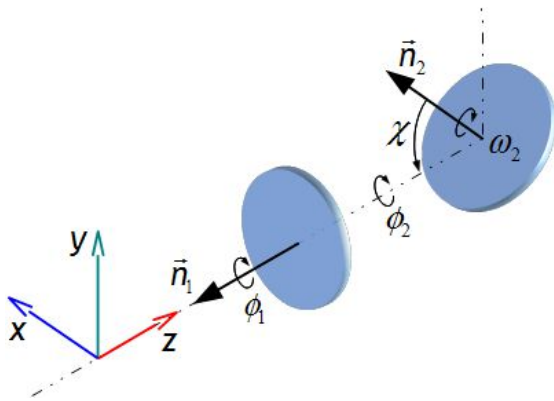

13 Figure 9 Rotation angles of an optical element. The rotations considered in this work are only  
 14  $\phi_1$  and  $\phi_2$ .

15 A linear retarding diattenuator  $\mathbf{M}_O$  rotated by  $\phi$  about the z-axis becomes

$$\mathbf{M}_O(\phi) = \mathbf{R}(\phi)\mathbf{M}_O\mathbf{R}(-\phi) =$$

$$= T_O \begin{pmatrix} 1 & 0 & 0 & 0 \\ 0 & c_{2\phi} & -s_{2\phi} & 0 \\ 0 & s_{2\phi} & c_{2\phi} & 0 \\ 0 & 0 & 0 & 1 \end{pmatrix} \begin{pmatrix} 1 & D_O & 0 & 0 \\ D_O & 1 & 0 & 0 \\ 0 & 0 & Z_O c_O & Z_O s_O \\ 0 & 0 & -Z_O s_O & Z_O c_O \end{pmatrix} \begin{pmatrix} 1 & 0 & 0 & 0 \\ 0 & c_{2\phi} & s_{2\phi} & 0 \\ 0 & -s_{2\phi} & c_{2\phi} & 0 \\ 0 & 0 & 0 & 1 \end{pmatrix} = \quad (S.5.2.2)$$

$$= T_O \begin{pmatrix} 1 & c_{2\phi}D_O & s_{2\phi}D_O & 0 \\ c_{2\phi}D_O & 1 - s_{2\phi}^2 W_O & s_{2\phi}c_{2\phi}W_O & -s_{2\phi}Z_O s_O \\ s_{2\phi}D_O & s_{2\phi}c_{2\phi}W_O & 1 - c_{2\phi}^2 W_O & c_{2\phi}Z_O s_O \\ 0 & s_{2\phi}Z_O s_O & -c_{2\phi}Z_O s_O & Z_O c_O \end{pmatrix}$$

$$2 \quad c_{2\phi} = \cos 2\phi, s_{2\phi} = \sin 2\phi, c_O = \cos \Delta_O, s_O = \sin \Delta_O, Z_O \equiv \sqrt{1 - D_O^2}, W_O = 1 - Z_O c_O \quad (S.5.2.3)$$

3 Without diattenuation we get

$$4 \quad D_O = 0 \Rightarrow Z_O = \sqrt{1 - D_O^2} = 1, W_O = 1 - c_O \quad (S.5.2.4)$$

5 and with ideal diattenuation

$$6 \quad |D_O| = 1, Z_O = \sqrt{1 - D_O^2} = 0, W_O = 1 \quad (S.5.2.5)$$

7 Rotation of a retarding diattenuator by  $\pm 45^\circ + \varepsilon$

$$\mathbf{M}_O(x45^\circ + \varepsilon) = \mathbf{R}(x45^\circ)\mathbf{M}_O(\varepsilon)\mathbf{R}(-x45^\circ) =$$

$$= T_O \begin{pmatrix} 1 & 0 & 0 & 0 \\ 0 & 0 & x & 0 \\ 0 & -x & 0 & 0 \\ 0 & 0 & 0 & 1 \end{pmatrix} \begin{pmatrix} 1 & c_{2\varepsilon}D_O & s_{2\varepsilon}D_O & 0 \\ c_{2\varepsilon}D_O & 1 - s_{2\varepsilon}^2 W_O & s_{2\varepsilon}c_{2\varepsilon}W_O & -s_{2\varepsilon}Z_O s_O \\ s_{2\varepsilon}D_O & s_{2\varepsilon}c_{2\varepsilon}W_O & 1 - c_{2\varepsilon}^2 W_O & c_{2\varepsilon}Z_O s_O \\ 0 & s_{2\varepsilon}Z_O s_O & -c_{2\varepsilon}Z_O s_O & Z_O c_O \end{pmatrix} \begin{pmatrix} 1 & 0 & 0 & 0 \\ 0 & 0 & -x & 0 \\ 0 & x & 0 & 0 \\ 0 & 0 & 0 & 1 \end{pmatrix} = \quad (S.5.2.6)$$

$$= T_O \begin{pmatrix} 1 & xs_{2\varepsilon}D_O & -xc_{2\varepsilon}D_O & 0 \\ xs_{2\varepsilon}D_O & 1 - c_{2\varepsilon}^2 W_O & -s_{2\varepsilon}c_{2\varepsilon}W_O & xc_{2\varepsilon}Z_O s_O \\ -xc_{2\varepsilon}D_O & -s_{2\varepsilon}c_{2\varepsilon}W_O & 1 - s_{2\varepsilon}^2 W_O & xs_{2\varepsilon}Z_O s_O \\ 0 & -xc_{2\varepsilon}Z_O s_O & -xs_{2\varepsilon}Z_O s_O & Z_O c_O \end{pmatrix} = \mathbf{R}(\varepsilon)\mathbf{M}_O(x45^\circ)\mathbf{R}(-\varepsilon)$$

9 Without error angle  $\varepsilon$ :

$$10 \quad \mathbf{M}_O(x45^\circ) = \mathbf{R}(x45^\circ)\mathbf{M}_O\mathbf{R}(-x45^\circ) = X_O \begin{pmatrix} 1 & 0 & xD_O & 0 \\ 0 & Z_O c_O & 0 & -xZ_O s_O \\ xD_O & 0 & 1 & 0 \\ 0 & xZ_O s_O & 0 & Z_O c_O \end{pmatrix} \quad (S.5.2.7)$$

1 **S.6 Mirror**

2 For a pure mirror without diattenuation or retardance the Müller matrix is

3 
$$\mathbf{M}_M = \begin{pmatrix} 1 & 0 & 0 & 0 \\ 0 & 1 & 0 & 0 \\ 0 & 0 & -1 & 0 \\ 0 & 0 & 0 & -1 \end{pmatrix} \quad (\text{S.6.1})$$

4 which results from the rotation of the detector (the eye) about the y-axis from the rear of the  
 5 optical element to the front as shown in Fig. 10.

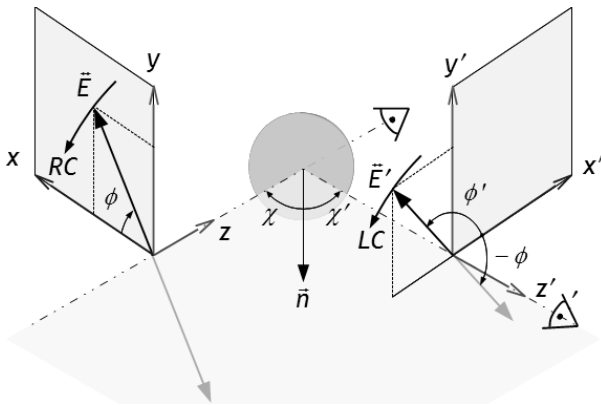

6 Figure 10: Reflection of light by a mirror. The light propagation is along the z-axis. The plane  
 7 of vibration of linearly polarised light is indicated by the E-vectors, and right and left circular  
 8 polarised light by the RC and LC arrows, respectively.

9 To explain the change of the axes, let the plane of vibration of linearly polarised light be  
 10 rotated in the (xyz) coordinate system by  $\phi$  around the z-axis, indicated by the E -vector in  
 11 Fig. 10, and the incident angle be  $\chi = 0$  for reflection from a mirror. After the mirror the  
 12 direction of light propagation has changed, but not the orientation of the plane of vibration,  
 13 indicated by the E'-vector. Hence, the rotation  $\phi'$  in the mirrored coordinate system (xyz)' is  $\phi'$   
 14  $= 180^\circ - \phi$ , which is equivalent to  $\phi' = -\phi$ . Thus a Stokes vector rotated by  $\mathbf{R}(\phi)$  in (xyz) is  
 15 described in (xyz)' after the mirror  $\mathbf{M}_M$  by

16 
$$\mathbf{I} = \mathbf{M}_M \mathbf{R}(\phi) \mathbf{I} = \mathbf{R}(-\phi) \mathbf{M}_M \mathbf{I} \quad (\text{S.6.2})$$

1 Furthermore, the circular polarisation has changed its sign from right circular (RC) before to  
 2 left circular (LC) after the mirror.

### 3 **S.6.1 Real mirror**

4 Real mirrors are dielectric or metal surfaces which can exhibit considerable phase retardation  
 5 and diattenuation under oblique incident angles. Hence, a real mirror is a linear retarding  
 6 diattenuator  $\mathbf{M}_O$  combined with a mirror  $\mathbf{M}_M$ .

$$\begin{aligned}
 & \mathbf{M}_{MO} = \\
 7 \quad & = T_O \begin{pmatrix} 1 & 0 & 0 & 0 \\ 0 & 1 & 0 & 0 \\ 0 & 0 & -1 & 0 \\ 0 & 0 & 0 & -1 \end{pmatrix} \begin{pmatrix} 1 & D_o & 0 & 0 \\ D_o & 1 & 0 & 0 \\ 0 & 0 & Z_o c_o & Z_o s_o \\ 0 & 0 & -Z_o s_o & Z_o c_o \end{pmatrix} = T_O \begin{pmatrix} 1 & D_o & 0 & 0 \\ D_o & 1 & 0 & 0 \\ 0 & 0 & -Z_o c_o & -Z_o s_o \\ 0 & 0 & Z_o s_o & -Z_o c_o \end{pmatrix} \quad (\text{S.6.1.1})
 \end{aligned}$$

8 which commute

$$9 \quad \mathbf{M}_{MO} = \mathbf{M}_M \mathbf{M}_O = \mathbf{M}_O \mathbf{M}_M = \mathbf{M}_{OM} \quad (\text{S.6.1.2})$$

10 Eq. (S.6.1.1) is also the description of the reflecting part of a polarising beam-splitter or of  
 11 any dichroic beam-splitter.

### 12 **S.6.2 Rotation of a reflecting surface**

13 If we rotate  $\mathbf{M}_{MO}$ , we have to mind the change of the coordinate system after the mirror. Here  
 14 it is important which element comes first, because, as explained above, applying a mirror  
 15 means a change of the local coordinate system after the mirror, and rotation of elements are  
 16 always done with respect to the local coordinate system before the element. Hence, a  
 17 diattenuator rotated in (xyz) plus a mirror described in (xyz)' is using (S.5.1.5) and (S.6.2)

$$\begin{aligned}
 18 \quad & \mathbf{M}_M \mathbf{M}_O(\phi) = \mathbf{M}_M \mathbf{R}(\phi) \mathbf{M}_O \mathbf{R}(-\phi) = \mathbf{R}(-\phi) \mathbf{M}_M \mathbf{M}_O \mathbf{R}(-\phi) = \mathbf{R}(-\phi) \mathbf{M}_{MO} \mathbf{R}(-\phi) = \\
 & = \mathbf{M}_{MO}(\phi) \quad (\text{S.6.2.1})
 \end{aligned}$$

19 Moving the mirror before the diattenuator

$$\begin{aligned}
 20 \quad & \mathbf{M}_O(\phi) \mathbf{M}_M = \mathbf{R}(\phi) \mathbf{M}_O \mathbf{R}(-\phi) \mathbf{M}_M = \mathbf{R}(\phi) \mathbf{M}_O \mathbf{M}_M \mathbf{R}(\phi) = \mathbf{R}(\phi) \mathbf{M}_{OM} \mathbf{R}(\phi) \\
 & = \mathbf{M}_{MO}(-\phi) \quad (\text{S.6.2.2})
 \end{aligned}$$

21 we see from (S.6.1.2) to (S.6.2.2) that

$$22 \quad \mathbf{M}_O(\phi) \mathbf{M}_M = \mathbf{M}_{OM}(\phi) = \mathbf{M}_M \mathbf{M}_O(-\phi) = \mathbf{M}_{MO}(-\phi). \quad (\text{S.6.2.3})$$

1 This explains why the rotation of a reflecting diattenuator has to be described as shown by  
 2 Chipman (2009b) , i.e.:

$$3 \quad \mathbf{M}_{OM}(\phi) = \mathbf{R}(\phi)\mathbf{M}_{OM}\mathbf{R}(\phi). \quad (\text{S.6.2.4})$$

### 4 **S.6.3 Beam-splitters and mirrors in the optical path**

5 In order to make the equations developed in this work applicable to a variety of lidar systems,  
 6 we have to investigate how the equations are changed when individual elements are changed  
 7 from transmitting to reflecting. This is also useful when the reflected and the transmitted paths  
 8 after a beam-splitter are to be described with the same equations.

9 Above we showed the local coordinate change behind a mirror. But how does this effect the  
 10 outcome of a lidar measurement and of the calibration measurements? Let's consider a chain  
 11 of rotated optical elements using the eigen-polarisations of the polarising beam-splitter matrix  
 12  $\mathbf{M}_S$  as the reference coordinate system

$$13 \quad \mathbf{I}_S = \eta_S \mathbf{M}_S \mathbf{M}_3(\gamma) \mathbf{M}_2(\phi) \mathbf{M}_1(\varepsilon) \mathbf{F} \mathbf{I}_{in} \quad (\text{S.6.3.1})$$

14 When we exchange  $\mathbf{M}_2$  with its reflecting counterpart  $\mathbf{M}_M \mathbf{M}_2$ , we can move the ideal mirror  
 15  $\mathbf{M}_M$  step by step to the right in the chain using (S.6.2.3)

$$\begin{aligned} 16 \quad \mathbf{I}'_S &= \eta_S \mathbf{M}_S \mathbf{M}_3(\gamma) \mathbf{M}_M \mathbf{M}_2(\phi) \mathbf{M}_1(\varepsilon) \mathbf{F} \mathbf{I}_L(\alpha) = \\ &= \eta_S \mathbf{M}_S \mathbf{M}_3(\gamma) \mathbf{M}_2(-\phi) \mathbf{M}_M \mathbf{M}_1(\varepsilon) \mathbf{F} \mathbf{I}_L(\alpha) = \\ &= \eta_S \mathbf{M}_S \mathbf{M}_3(\gamma) \mathbf{M}_2(-\phi) \mathbf{M}_1(-\varepsilon) \mathbf{M}_M \mathbf{F} \mathbf{I}_L(\alpha) = \\ &= \eta_S \mathbf{M}_S \mathbf{M}_3(\gamma) \mathbf{M}_2(-\phi) \mathbf{M}_1(-\varepsilon) \mathbf{F} \mathbf{I}_L^*(-\alpha) \end{aligned} \quad (\text{S.6.3.2})$$

17 and see that all rotation angles before the changed element are inverted. In the last step of Eq.  
 18 (S.6.3.2) the depolarising atmospheric  $\mathbf{F}$ -matrix is rotational invariant, and the circular  
 19 polarisation of the input Stokes vector changes its sign, indicated by the star.

20 In other words: equations, which are derived for the system in Eq. (S.6.3.1), can be used for  
 21 the system with an additional mirror as in Eq. (S.6.3.2) by inverting in the original equations  
 22 all rotation angles before the mirror and reversing the circular polarisation of the input Stokes  
 23 vector. In case two surfaces are changed from transmitting to reflecting as

$$\begin{aligned} 24 \quad \mathbf{I}''_S &= \eta_S \mathbf{M}_S \mathbf{M}_3(\gamma) \mathbf{M}_M \mathbf{M}_2(\phi) \mathbf{M}_1(\varepsilon) \mathbf{F} \mathbf{M}_M \mathbf{I}_{in} = \\ &= \eta_S \mathbf{M}_S \mathbf{M}_3(\gamma) \mathbf{M}_2(-\phi) \mathbf{M}_1(-\varepsilon) \mathbf{M}_M \mathbf{M}_M \mathbf{F} \mathbf{I}_{in} = \\ &= \eta_S \mathbf{M}_S \mathbf{M}_3(\gamma) \mathbf{M}_2(-\phi) \mathbf{M}_1(-\varepsilon) \mathbf{F} \mathbf{I}_{in} \end{aligned} \quad (\text{S.6.3.3})$$

1 where a mirror is additionally placed behind the emitter optics, only the rotation angles  
 2 between these two elements are inversed, because  $\mathbf{M}_M \mathbf{M}_M = \mathbf{1}$ , and the circular polarisation is  
 3 not changed.

4 Real mirrors are usually dielectric or metal surfaces which can exhibit considerable phase  
 5 retardation and diattenuation under oblique incident angles. For incident angles smaller than  
 6 the Brewster angle the phase changes for p- (parallel) and s- (perpendicular) polarised light  
 7 are "in the same direction".

## 8 **S.7 Standard atmospheric measurement signals**

### 9 **S.7.1 Lidar signal with rotational error before the polarising beam-** 10 **splitter**

11 General case with arbitrary laser input and emitter optics  $\mathbf{I}_E = \mathbf{M}_E \mathbf{I}_L$  and  $\mathbf{R}(\varepsilon, h)$  from Eq.  
 12 (S.10.15.1):

$$13 \quad \langle \mathbf{A}_S | = \langle \mathbf{M}_S \mathbf{R}_y | \mathbf{R}(\varepsilon) \mathbf{M}_h = T_S \langle 1 \quad yD_S \quad 0 \quad 0 | \begin{pmatrix} 1 & 0 & 0 & 0 \\ 0 & c_{2\varepsilon} & -hs_{2\varepsilon} & 0 \\ 0 & s_{2\varepsilon} & hc_{2\varepsilon} & 0 \\ 0 & 0 & 0 & h \end{pmatrix} = \quad (S.7.1.1)$$

$$= T_S \langle 1 \quad c_{2\varepsilon} yD_S \quad -hs_{2\varepsilon} yD_S \quad 0 |$$

14 Analyser vector from Eqs. (S.7.1.1) and input Stokes vector from (E.31) yield

$$\frac{\langle \mathbf{M}_S \mathbf{R}_y | \mathbf{R}(\varepsilon) \mathbf{M}_h | \mathbf{M}_O(\gamma) \mathbf{F}(a) \mathbf{M}_E \mathbf{I}_L \rangle}{T_S T_{rot} T_O F_{11} T_E I_L} =$$

$$= \left\langle \begin{array}{c} 1 \\ c_{2\varepsilon} yD_S \\ -hs_{2\varepsilon} yD_S \\ 0 \end{array} \left\| \begin{array}{c} i_E + D_O a (c_{2\gamma} q_E - s_{2\gamma} u_E) \\ c_{2\gamma} D_O i_E + a q_E - s_{2\gamma} [W_O a (s_{2\gamma} q_E + c_{2\gamma} u_E) + Z_O s_O (1 - 2a) v_E] \\ s_{2\gamma} D_O i_E - a u_E + c_{2\gamma} [W_O a (s_{2\gamma} q_E + c_{2\gamma} u_E) + Z_O s_O (1 - 2a) v_E] \\ Z_O s_O a (s_{2\gamma} q_E + c_{2\gamma} u_E) + Z_O c_O (1 - 2a) v_E \end{array} \right. \right\rangle =$$

$$= (1 + yD_S D_O c_{2\gamma+h2\varepsilon}) i_E - yD_S Z_O s_O s_{2\gamma+h2\varepsilon} v_E +$$

$$+ a \left\{ D_O (c_{2\gamma} q_E - s_{2\gamma} u_E) + yD_S \left[ (c_{2\varepsilon} q_E + hs_{2\varepsilon} u_E) - s_{2\gamma+h2\varepsilon} (W_O (s_{2\gamma} q_E + c_{2\gamma} u_E) - 2Z_O s_O v_E) \right] \right\}$$

15 (S.7.1.2)

$$\gamma = 0 \Rightarrow$$

$$\begin{aligned} & \frac{\langle \mathbf{M}_S \mathbf{R}_y | \mathbf{R}(\varepsilon) \mathbf{M}_h | \mathbf{M}_O(0) \mathbf{F}(a) \mathbf{M}_E \mathbf{I}_L \rangle}{T_S T_{rot} T_O F_{11} T_E I_L} = \\ & = (1 + yD_S D_O c_{h2\varepsilon}) i_E - yD_S Z_O s_O s_{h2\varepsilon} v_E + a \{ (D_O + yD_S c_{2\varepsilon}) q_E + yD_S s_{h2\varepsilon} Z_O (c_O u_E + 2s_O v_E) \} \end{aligned} \quad (S.7.1.3)$$

1

$$\gamma = \varepsilon = 0 \Rightarrow$$

$$\frac{\langle \mathbf{M}_S \mathbf{R}_y | \mathbf{R}(0) \mathbf{M}_h | \mathbf{M}_O(0) \mathbf{F}(a) \mathbf{M}_E \mathbf{I}_L \rangle}{T_S T_{rot} T_O F_{11} T_E I_L} = (1 + yD_S D_O) i_E + a (D_O + yD_S) q_E \quad (S.7.1.4)$$

2

$$\gamma = -h\varepsilon \Rightarrow$$

$$\frac{\langle \mathbf{M}_S \mathbf{R}_y | \mathbf{R}(\varepsilon) \mathbf{M}_h | \mathbf{M}_O(-h\varepsilon) \mathbf{F}(a) \mathbf{M}_E \mathbf{I}_L \rangle}{T_S T_{rot} T_O F_{11} T_E I_L} = (1 + yD_S D_O) i_E + a (D_O + yD_S) (c_{2\gamma} q_E - s_{2\gamma} u_E) \quad (S.7.1.5)$$

3

4 With horizontal linearly polarised emitter input Stokes vector  $\mathbf{I}_E$

$$i_E = 1, q_E = 1, u_E = v_E = 0 \Rightarrow$$

$$\frac{\langle \mathbf{M}_S \mathbf{R}_y | \mathbf{R}(\varepsilon) \mathbf{M}_h \mathbf{M}_O(\gamma) \mathbf{F}(a) | 1 \ 1 \ 0 \ 0 \rangle}{T_S T_{rot} T_O F_{11} T_E I_L} = (1 + yD_S D_O c_{2\gamma+h2\varepsilon} + a \{ D_O c_{2\gamma} + yD_S (c_{2\varepsilon} - s_{2\gamma+h2\varepsilon} s_{2\gamma} W_O) \}) \quad (S.7.1.6)$$

5



1 With rotated, linearly polarised laser and emitter optics

$$q_L = 1, u_L = 0, v_L = 0 \Rightarrow$$

$$\begin{aligned} & \frac{\langle \mathbf{M}_S \mathbf{R}_y | \mathbf{R}(\varepsilon) | \mathbf{M}_O(\gamma) \mathbf{F}(a) \mathbf{M}_E(\beta) \mathbf{I}_L(\alpha) \rangle}{T_S T_O F_{11} T_E I_L} = \\ & = 1 + D_E c_{2\alpha-2\beta} + y D_S \left\{ D_O c_{2\varepsilon+2\gamma} (1 + D_E c_{2\alpha-2\beta}) + Z_O s_O s_{2\varepsilon+2\gamma} Z_E s_E s_{2\alpha-2\beta} \right\} + \\ & + a \left\{ \begin{aligned} & D_O \left[ c_{2\gamma} (c_{2\beta} D_E + c_{2\alpha} + s_{2\beta} W_E s_{2\alpha-2\beta}) - s_{2\gamma} (s_{2\beta} D_E + s_{2\alpha} - c_{2\beta} W_E s_{2\alpha-2\beta}) \right] + \\ & \left[ c_{2\varepsilon} (c_{2\beta} D_E + c_{2\alpha} + s_{2\beta} W_E s_{2\alpha-2\beta}) + s_{2\varepsilon} (s_{2\beta} D_E + s_{2\alpha} - c_{2\beta} W_E s_{2\alpha-2\beta}) \right] - \\ & + y D_S \left[ \begin{aligned} & -s_{2\varepsilon+2\gamma} \left( W_O (s_{2\gamma} (c_{2\beta} D_E + c_{2\alpha} + s_{2\beta} W_E s_{2\alpha-2\beta}) + c_{2\gamma} (s_{2\beta} D_E + s_{2\alpha} - c_{2\beta} W_E s_{2\alpha-2\beta})) \right) + \\ & + 2 Z_O s_O Z_E s_E s_{2\alpha-2\beta} \end{aligned} \right] \end{aligned} \right\} = \\ & = (1 + c_{2\gamma+2\varepsilon} y D_S D_O) (1 + c_{2\alpha-2\beta} D_E) + s_{2\gamma+2\varepsilon} s_{2\alpha-2\beta} y D_S Z_O s_O Z_E s_E + \\ & + a \left\{ \begin{aligned} & D_O (c_{2\alpha-2\gamma} + c_{2\beta-2\gamma} D_E + s_{2\beta+2\gamma} s_{2\alpha-2\beta} W_E) + \\ & \left[ (c_{2\alpha-2\varepsilon} + c_{2\beta-2\varepsilon} D_E + s_{2\beta-2\varepsilon} s_{2\alpha-2\beta} W_E) - \right. \\ & + y D_S \left[ \begin{aligned} & -s_{2\gamma+2\varepsilon} W_O (s_{2\alpha+2\gamma} + s_{2\beta+2\gamma} D_E - c_{2\beta-2\gamma} s_{2\alpha-2\beta} W_E) - \\ & - s_{2\gamma+2\varepsilon} s_{2\alpha-2\beta} 2 Z_O s_O Z_E s_E \end{aligned} \right] \end{aligned} \right\} \end{aligned}$$

2 (S.7.1.7)

$$q_L = 1, u_L = 0, v_L = 0 \wedge \gamma = 0 \Rightarrow$$

$$\begin{aligned} & \frac{\langle \mathbf{M}_S \mathbf{R}_y | \mathbf{R}(\varepsilon) | \mathbf{M}_O(\gamma) \mathbf{F}(a) \mathbf{M}_E(\beta) \mathbf{I}_L(\alpha) \rangle}{T_S T_O F_{11} T_E I_L} = \\ & = (1 + c_{2\varepsilon} y D_S D_O) (1 + c_{2\alpha-2\beta} D_E) + s_{2\varepsilon} s_{2\alpha-2\beta} y D_S Z_O s_O Z_E s_E + \\ & + a \left\{ \begin{aligned} & D_O (c_{2\alpha} + c_{2\beta} D_E + s_{2\beta} s_{2\alpha-2\beta} W_E) + \\ & \left[ (c_{2\alpha-2\varepsilon} + c_{2\beta-2\varepsilon} D_E + s_{2\beta-2\varepsilon} s_{2\alpha-2\beta} W_E) - \right. \\ & + y D_S \left[ \begin{aligned} & -s_{2\varepsilon} W_O (s_{2\alpha} + s_{2\beta} D_E - c_{2\beta} s_{2\alpha-2\beta} W_E) - \\ & - s_{2\varepsilon} s_{2\alpha-2\beta} 2 Z_O s_O Z_E s_E \end{aligned} \right] \end{aligned} \right\} \end{aligned}$$

3 (S.7.1.8)

$$q_L = 1, u_L = 0, v_L = 0, \varepsilon = -\gamma \Rightarrow$$

$$\begin{aligned} & \frac{\langle \mathbf{M}_S \mathbf{R}_y | \mathbf{R}(-\gamma) | \mathbf{M}_O(\gamma) \mathbf{F}(a) \mathbf{M}_E(\beta) \mathbf{I}_L(\alpha) \rangle}{T_S T_O F_{11} T_E I_L} = \\ & = (1 + y D_S D_O) (1 + c_{2\alpha-2\beta} D_E) + \\ & + a \left\{ D_O (c_{2\alpha-2\gamma} + c_{2\beta-2\gamma} D_E + s_{2\beta+2\gamma} s_{2\alpha-2\beta} W_E) + y D_S (c_{2\alpha+2\gamma} + c_{2\beta+2\gamma} D_E + s_{2\beta+2\gamma} s_{2\alpha-2\beta} W_E) \right\} \end{aligned}$$

4 (S.7.1.9)

$$q_L = 1, u_L = 0, v_L = 0, \varepsilon = \gamma = 0 \Rightarrow$$

$$1 \quad \frac{\langle \mathbf{M}_S \mathbf{R}_y \mathbf{R}(\varepsilon) \parallel \mathbf{M}_O(\gamma) \mathbf{F}(a) \mathbf{M}_E(\beta) \mathbf{I}_L(\alpha) \rangle}{T_S T_O F_{11} T_E I_L} = \quad (S.7.1.10)$$

$$= (1 + yD_S D_O) (1 + c_{2\alpha-2\beta} D_E) + a(D_O + yD_S) (c_{2\alpha} + c_{2\beta} D_E + s_{2\beta} s_{2\alpha-2\beta} W_E)$$

## 2 S.7.2 Lidar signal with rotational error before the receiving optics

3 With Eq. (D.7) for the analyser part and (E.26) for the general input vector we get

$$4 \quad \frac{\langle \mathbf{A}_S(y, \gamma) \parallel \mathbf{I}_{in, \varepsilon}(\varepsilon, h, a) \rangle}{T_S T_O T_{rot} F_{11} T_E I_L} = \frac{\langle \mathbf{M}_S \mathbf{R}_y \mathbf{M}_O(\gamma) \parallel \mathbf{R}(\varepsilon) \mathbf{M}_h \mathbf{F}(a) \mathbf{I}_E \rangle}{T_S T_O T_{rot} F_{11} T_E I_L} =$$

$$= \left\langle \begin{array}{c} 1 + y c_{2\gamma} D_O D_S \\ c_{2\gamma} D_O + y D_S (1 - s_{2\gamma}^2 W_O) \\ s_{2\gamma} (D_O + y c_{2\gamma} D_S W_O) \\ - y s_{2\gamma} D_S Z_O S_O \end{array} \parallel \begin{array}{c} i_E \\ a(q_E c_{2\varepsilon} + h u_E s_{2\varepsilon}) \\ a(q_E s_{2\varepsilon} - h u_E c_{2\varepsilon}) \\ (1 - 2a) h v_E \end{array} \right\rangle = \quad (S.7.2.1)$$

$$= (1 + y c_{2\gamma} D_O D_S) i_E - y s_{2\gamma} D_S Z_O S_O h v_E +$$

$$+ a \left\{ \begin{array}{l} D_O [c_{2\gamma-2\varepsilon} q_E - s_{2\gamma-2\varepsilon} h u_E] - y D_S W_O s_{2\gamma} [s_{2\gamma-2\varepsilon} q_E + c_{2\gamma-2\varepsilon} h u_E] + \\ + y D_S [q_E c_{2\varepsilon} + h u_E s_{2\varepsilon} + 2 s_{2\gamma} Z_O S_O h v_E] \end{array} \right\}$$

5 Comparison with Eq. (69):

$$\varepsilon = 0 \Rightarrow$$

$$6 \quad \frac{\langle \mathbf{M}_S \mathbf{R}_y \mathbf{M}_O(\gamma) \parallel \mathbf{R}(\varepsilon) \mathbf{M}_h \mathbf{F}(a) \mathbf{I}_E \rangle}{T_S T_O T_{rot} F_{11} T_E I_L} = \quad (S.7.2.2)$$

$$= (1 + y c_{2\gamma} D_O D_S) i_E - y s_{2\gamma} D_S Z_O S_O h v_E +$$

$$+ a \left\{ \begin{array}{l} D_O [c_{2\gamma} q_E - s_{2\gamma} h u_E] - y D_S W_O s_{2\gamma} [s_{2\gamma} q_E + c_{2\gamma} h u_E] + \\ + y D_S [q_E + 2 s_{2\gamma} Z_O S_O h v_E] \end{array} \right\}$$

$$\gamma = 0 \Rightarrow$$

$$7 \quad \frac{\langle \mathbf{M}_S \mathbf{R}_y \mathbf{M}_O(\gamma) \parallel \mathbf{R}(\varepsilon) \mathbf{M}_h \mathbf{F}(a) \mathbf{I}_E \rangle}{T_S T_O T_{rot} F_{11} T_E I_L} = (1 + y D_O D_S) i_E + a(D_O + y D_S) [c_{2\varepsilon} q_E + s_{2\varepsilon} h u_E] \quad (S.7.2.3)$$

## 8 S.7.3 Lidar signal with rotational error behind the emitter optics

9 We get the equation for this case directly from the previous one considering that moving the  
10 matrices for the rotational error from before the receiving optics to behind the emitter optics  
11 just changes the sign of the angle  $\varepsilon$  using Eq. (S.6.2)

$$\begin{aligned}
& \frac{\langle \mathbf{A}_S(y, \gamma, a) \mid \mathbf{I}_{in, \varepsilon}(\varepsilon, \mathbf{h}) \rangle}{T_O T_S F_{11} T_{rot} T_E I_L} = \frac{\langle \mathbf{M}_S \mathbf{R}_y \mathbf{M}_O(\gamma) \mathbf{F}(a) \mid \mathbf{R}(\varepsilon) \mathbf{M}_h \mathbf{I}_E \rangle}{T_O T_S F_{11} T_{rot} T_E I_L} = \\
& = \frac{\langle \mathbf{M}_S \mathbf{R}_y \mathbf{M}_O(\gamma) \mathbf{R}(-\varepsilon) \mathbf{M}_h \mid \mathbf{F}(a) \mathbf{I}_E \rangle}{T_O T_S F_{11} T_{rot} T_E I_L} = \frac{\langle \mathbf{A}_S(y, \gamma) \mid \mathbf{I}_{in, \varepsilon}(-\varepsilon, \mathbf{h}, a) \rangle}{T_S T_O T_{rot} F_{11} T_E I_L}
\end{aligned} \tag{S.7.3.1}$$

## 2 S.8 Attenuated backscatter coefficient

3 Attenuated backscatter coefficient  $F_{11}$  derived from the transmitted signal  $I_T$

$$\begin{aligned}
& \eta_T T_T T_O F_{11} T_E I_L = \frac{I_T}{G_T + a H_T} = \frac{I_T}{G_T + \frac{\delta^* G_T - G_R}{H_R - \delta^* H_T} H_T} = \frac{(H_R - \delta^* H_T) I_T}{(H_R - \delta^* H_T) G_T + (\delta^* G_T - G_R) H_T} \\
& = \frac{(H_R - \delta^* H_T) I_T}{H_R G_T - H_T G_R} = \frac{\left( H_R - \frac{1}{\eta} \frac{I_R}{I_T} H_T \right) I_T}{H_R G_T - H_T G_R} = \frac{H_R I_T - \frac{1}{\eta} I_R H_T}{H_R G_T - H_T G_R}
\end{aligned} \tag{S.8.1}$$

5 With  $\eta = \eta_R T_R / \eta_T T_T$  we get the attenuated backscatter coefficient

$$F_{11} = \frac{1}{\eta_T T_T T_O I_L} \frac{H_R I_T - \frac{\eta_T T_T}{\eta_R T_R} H_T I_R}{H_R G_T - H_T G_R} = \frac{1}{T_O I_L} \frac{H_R \frac{I_T}{\eta_T T_T} - H_T \frac{I_R}{\eta_R T_R}}{H_R G_T - H_T G_R} \tag{S.8.2}$$

## 7 S.9 Rayleigh calibration

8 Calibration in ranges with presumably known aerosol depolarisation:

9 With some lidar systems the calibration factor is determined in a measurement range with  
10 known linear volume depolarisation ratio  $\delta$ , for example in clean air  $\delta^m$ . Assuming, for the  
11 sake of simplicity, an ideal PBS (see Eq. (28)), we get with Eq. (26) for the calibration factor  
12 in clean air  $\eta^m$

$$\delta^*(0^\circ) = \frac{1}{\eta} \frac{I_R}{I_T}(0^\circ) \Rightarrow \eta^m = \frac{1}{\delta^m} \frac{I_R}{I_T}(0^\circ) \tag{S.9.1}$$

14 Assuming further that the errors in  $I_R$  and  $I_T$  are independent, which could be the case if the  
15 background subtraction or nonlinearities in analog signal detection are the main error sources  
16 for them, we get as a first estimate for the relative error of the calibration factor

$$\frac{\Delta \eta^m}{\eta^m} = \frac{\Delta \delta^m}{\delta^m} + \frac{\Delta I_R}{I_R} + \frac{\Delta I_T}{I_T} \tag{S.9.2}$$

18 This error can easily become very large. The linear depolarisation ratio measured in a volume  
19 of air molecules  $\delta^m$  depends on the width of the interference filters, as they transmit or reject

1 some rotational Raman lines, and on the atmospheric temperature Behrendt and Nakamura  
 2 (2002). At 355 nm  $\delta^m$  can range from about 0.004 to 0.015. Errors in the order of some 10% in  
 3  $\delta^m$  are already possible in case the wavelength dependence of the transmission of the IFF or its  
 4 tilt angle in the optical setup are not known accurately. Furthermore, a small contamination of  
 5 the assumed clean air with strongly depolarising aerosol as Saharan dust or ice particles from  
 6 subvisible cirrus can change the volume linear depolarisation ratio dramatically. Assuming a  
 7 small backscatter ratio of 1.01 due to particles with  $\delta^p = 0.3$  and with  $\delta^m = 0.004$ , we get Biele  
 8 et al. (2000) a real  $\delta = 0.01 * \delta^p + \delta^m = 0.007$ , which would cause a relative error in the  
 9 calibration factor  $\eta^m$  of  $(0.007-0.004)/0.004 = +75\%$ . Better than this "clean" air calibration  
 10 would even be to use a calibration in a cirrus cloud with  $\delta^p$  between let's say 0.3 and 0.5, with  
 11 a resulting calibration factor error of "only"  $+0.1/0.4 = +25\%$ .

12 Summary of this chapter: Depolarisation calibration with presumably known atmospheric  
 13 depolarisation can cause very large calibration errors.

## 14 **S.10 Some Müller matrices**

### 15 **S.10.1 Depolariser**

16 A diagonal depolariser  $\mathbf{M}_{DD}$  (Chipman, 2009b)

$$17 \quad \mathbf{M}_{DD} = \begin{pmatrix} 1 & 0 & 0 & 0 \\ 0 & a & 0 & 0 \\ 0 & 0 & b & 0 \\ 0 & 0 & 0 & c \end{pmatrix} \quad (\text{S.10.1.1})$$

18 partially depolarises the incident light depending on its state of polarisation. For atmospheric  
 19 depolarisation by randomly oriented, nonspherical particles with rotation and reflection  
 20 symmetry it can be shown that  $b = -a$  and  $c = (1 - 2a)$  (van de Hulst, 1981; Mishchenko and  
 21 Hovenier, 1995; Mishchenko et al., 2002) (see also Sect. 2.1), which results in the  
 22 backscattering matrix

$$23 \quad \mathbf{F} = \begin{pmatrix} F_{11} & 0 & 0 & 0 \\ 0 & F_{22} & 0 & 0 \\ 0 & 0 & -F_{22} & 0 \\ 0 & 0 & 0 & F_{44} \end{pmatrix} = F_{11} \begin{pmatrix} 1 & 0 & 0 & 0 \\ 0 & a & 0 & 0 \\ 0 & 0 & -a & 0 \\ 0 & 0 & 0 & 1-2a \end{pmatrix} \quad (\text{S.10.1.2})$$

1 **S.10.2 Rotation matrix for various rotation angles**

$$\mathbf{R}(\phi) = \begin{pmatrix} 1 & 0 & 0 & 0 \\ 0 & c_{2\phi} & -s_{2\phi} & 0 \\ 0 & s_{2\phi} & c_{2\phi} & 0 \\ 0 & 0 & 0 & 1 \end{pmatrix}, \quad \mathbf{R}(x\phi) = \begin{pmatrix} 1 & 0 & 0 & 0 \\ 0 & c_{2\phi} & -xs_{2\phi} & 0 \\ 0 & xs_{2\phi} & c_{2\phi} & 0 \\ 0 & 0 & 0 & 1 \end{pmatrix} \quad (\text{S.10.2.1})$$

$$\mathbf{R}(x45^\circ) = \begin{pmatrix} 1 & 0 & 0 & 0 \\ 0 & 0 & -x & 0 \\ 0 & x & 0 & 0 \\ 0 & 0 & 0 & 1 \end{pmatrix}$$

$$3 \quad \mathbf{R}(x, \varepsilon) = \mathbf{R}(x45^\circ + \varepsilon) = \mathbf{R}(x45^\circ)\mathbf{R}(\varepsilon) = \mathbf{R}(\varepsilon)\mathbf{R}(x45^\circ) = \begin{pmatrix} 1 & 0 & 0 & 0 \\ 0 & -xs_{2\varepsilon} & -xc_{2\varepsilon} & 0 \\ 0 & xc_{2\varepsilon} & -xs_{2\varepsilon} & 0 \\ 0 & 0 & 0 & 1 \end{pmatrix} \quad (\text{S.10.2.2})$$

4 See Supp. S.10.15. regarding the half-wave plate rotation.

$$5 \quad \mathbf{R}(90^\circ) = \begin{pmatrix} 1 & 0 & 0 & 0 \\ 0 & -1 & 0 & 0 \\ 0 & 0 & -1 & 0 \\ 0 & 0 & 0 & 1 \end{pmatrix}, \quad \mathbf{R}_y = \mathbf{R}(y) \equiv \begin{pmatrix} 1 & 0 & 0 & 0 \\ 0 & y & 0 & 0 \\ 0 & 0 & y & 0 \\ 0 & 0 & 0 & 1 \end{pmatrix} \Rightarrow \begin{matrix} \mathbf{R}(y = -1) = \mathbf{R}(90^\circ) \\ \mathbf{R}(y = +1) = \mathbf{R}(0^\circ) \end{matrix} \quad (\text{S.10.2.3})$$

6 **S.10.3 Retarding linear diattenuator**

$$\mathbf{M}_O = \mathbf{M}_D \mathbf{M}_{ret} = \mathbf{M}_{ret} \mathbf{M}_D =$$

$$7 \quad = \begin{pmatrix} 1 & 0 & 0 & 0 \\ 0 & 1 & 0 & 0 \\ 0 & 0 & c_o & s_o \\ 0 & 0 & -s_o & c_o \end{pmatrix} T_O \begin{pmatrix} 1 & D_o & 0 & 0 \\ D_o & 1 & 0 & 0 \\ 0 & 0 & Z_o & 0 \\ 0 & 0 & 0 & Z_o \end{pmatrix} = T_O \begin{pmatrix} 1 & D_o & 0 & 0 \\ D_o & 1 & 0 & 0 \\ 0 & 0 & Z_o c_o & Z_o s_o \\ 0 & 0 & -Z_o s_o & Z_o c_o \end{pmatrix} \quad (\text{S.10.3.1})$$

$$8 \quad D_o = \frac{T_o^p - T_o^s}{T_o^p + T_o^s}, \quad Z_o = \sqrt{1 - D_o^2}, \quad W_o = 1 - Z_o c_o \quad (\text{S.10.3.2})$$

$$c_o = \cos \Delta_o = \cos(\varphi_o^p - \varphi_o^s), \quad s_o = \sin \Delta_o$$

$$9 \quad -1 \leq D_o \leq +1 \Rightarrow 0 \leq Z_o \leq 1, \quad 0 \leq W_o \leq 2 \quad (\text{S.10.3.3})$$

1 **S.10.4 Rotated, retarding linear diattenuator**

$$\mathbf{M}_O(x\phi) = \mathbf{R}(x\phi)\mathbf{M}_O\mathbf{R}(-x\phi) =$$

$$\begin{aligned}
 &= T_O \begin{pmatrix} 1 & 0 & 0 & 0 \\ 0 & c_{2\phi} & -xs_{2\phi} & 0 \\ 0 & xs_{2\phi} & c_{2\phi} & 0 \\ 0 & 0 & 0 & 1 \end{pmatrix} \begin{pmatrix} 1 & D_O & 0 & 0 \\ D_O & 1 & 0 & 0 \\ 0 & 0 & Z_O c_O & Z_O s_O \\ 0 & 0 & -Z_O s_O & Z_O c_O \end{pmatrix} \begin{pmatrix} 1 & 0 & 0 & 0 \\ 0 & c_{2\phi} & xs_{2\phi} & 0 \\ 0 & -xs_{2\phi} & c_{2\phi} & 0 \\ 0 & 0 & 0 & 1 \end{pmatrix} = \\
 2 &= T_O \begin{pmatrix} 1 & c_{2\phi}D_O & xs_{2\phi}D_O & 0 \\ c_{2\phi}D_O & 1-s_{2\phi}^2W_O & xs_{2\phi}c_{2\phi}W_O & -xs_{2\phi}Z_Os_O \\ xs_{2\phi}D_O & xs_{2\phi}c_{2\phi}W_O & 1-c_{2\phi}^2W_O & c_{2\phi}Z_Os_O \\ 0 & xs_{2\phi}Z_Os_O & -c_{2\phi}Z_Os_O & Z_Oc_O \end{pmatrix} \quad (S.10.4.1)
 \end{aligned}$$

3 **S.10.5 Rotated, retarding linear diattenuator mirror**

$$\mathbf{M}_{MO}(x\phi) = \mathbf{R}(x\phi)\mathbf{M}_{MO}\mathbf{R}(x\phi) =$$

$$\begin{aligned}
 &= T_O \begin{pmatrix} 1 & 0 & 0 & 0 \\ 0 & c_{2\phi} & -xs_{2\phi} & 0 \\ 0 & xs_{2\phi} & c_{2\phi} & 0 \\ 0 & 0 & 0 & 1 \end{pmatrix} \begin{pmatrix} 1 & D_O & 0 & 0 \\ D_O & 1 & 0 & 0 \\ 0 & 0 & -Z_O c_O & -Z_O s_O \\ 0 & 0 & Z_O s_O & -Z_O c_O \end{pmatrix} \begin{pmatrix} 1 & 0 & 0 & 0 \\ 0 & c_{2\phi} & -xs_{2\phi} & 0 \\ 0 & xs_{2\phi} & c_{2\phi} & 0 \\ 0 & 0 & 0 & 1 \end{pmatrix} = \\
 4 &= T_O \begin{pmatrix} 1 & c_{2\phi}D_O & -xs_{2\phi}D_O & 0 \\ c_{2\phi}D_O & 1-s_{2\phi}^2W_O & -xs_{2\phi}c_{2\phi}W_O & xs_{2\phi}Z_Os_O \\ xs_{2\phi}D_O & xs_{2\phi}c_{2\phi}W_O & -(1-c_{2\phi}^2W_O) & -c_{2\phi}Z_Os_O \\ 0 & xs_{2\phi}Z_Os_O & c_{2\phi}Z_Os_O & -Z_Oc_O \end{pmatrix} = \\
 &= T_O \begin{pmatrix} 1 & c_{2\phi}D_O & xs_{2\phi}D_O & 0 \\ c_{2\phi}D_O & 1-s_{2\phi}^2W_O & xs_{2\phi}c_{2\phi}W_O & -xs_{2\phi}Z_Os_O \\ xs_{2\phi}D_O & xs_{2\phi}c_{2\phi}W_O & 1-c_{2\phi}^2W_O & c_{2\phi}Z_Os_O \\ 0 & xs_{2\phi}Z_Os_O & -c_{2\phi}Z_Os_O & Z_Oc_O \end{pmatrix} \begin{pmatrix} 1 & 0 & 0 & 0 \\ 0 & 1 & 0 & 0 \\ 0 & 0 & -1 & 0 \\ 0 & 0 & 0 & -1 \end{pmatrix} \quad (S.10.5.1)
 \end{aligned}$$

1 **S.10.6**  $\pm 45^\circ$  rotated retarding linear diattenuator including error  $\varepsilon$

$$\begin{aligned}
 \mathbf{M}_O(x45^\circ + \varepsilon) &= \mathbf{R}(x45^\circ + \varepsilon) \mathbf{M}_O \mathbf{R}(-x45^\circ - \varepsilon) = \\
 &= T_O \begin{pmatrix} 1 & 0 & 0 & 0 \\ 0 & -xS_{2\varepsilon} & -xC_{2\varepsilon} & 0 \\ 0 & xC_{2\varepsilon} & -xS_{2\varepsilon} & 0 \\ 0 & 0 & 0 & 1 \end{pmatrix} \begin{pmatrix} 1 & D_O & 0 & 0 \\ D_O & 1 & 0 & 0 \\ 0 & 0 & Z_O c_O & Z_O s_O \\ 0 & 0 & -Z_O s_O & Z_O c_O \end{pmatrix} \begin{pmatrix} 1 & 0 & 0 & 0 \\ 0 & -xS_{2\varepsilon} & xC_{2\varepsilon} & 0 \\ 0 & -xC_{2\varepsilon} & -xS_{2\varepsilon} & 0 \\ 0 & 0 & 0 & 1 \end{pmatrix} = \\
 &= T_O \begin{pmatrix} 1 & -xS_{2\varepsilon} D_O & xC_{2\varepsilon} D_O & 0 \\ -xS_{2\varepsilon} D_O & 1 - c_{2\varepsilon}^2 W_O & -s_{2\varepsilon} c_{2\varepsilon} W_O & -xC_{2\varepsilon} Z_O s_O \\ xC_{2\varepsilon} D_O & -s_{2\varepsilon} c_{2\varepsilon} W_O & 1 - s_{2\varepsilon}^2 W_O & -xS_{2\varepsilon} Z_O s_O \\ 0 & xC_{2\varepsilon} Z_O s_O & xS_{2\varepsilon} Z_O s_O & Z_O c_O \end{pmatrix}
 \end{aligned} \tag{S.10.6.1}$$

3 **S.10.7**  $\pm 45^\circ$  rotated retarding linear diattenuator

$$\mathbf{M}_O(x45^\circ) = T_O \begin{pmatrix} 1 & 0 & xD_O & 0 \\ 0 & Z_O c_O & 0 & -xZ_O s_O \\ xD_O & 0 & 1 & 0 \\ 0 & xZ_O s_O & 0 & Z_O c_O \end{pmatrix} \tag{S.10.7.1}$$

5 **S.10.8** Rotated, ideal linear polariser and analyser

6 Note: without absorption  $T_P = 0.5$ .

$$\begin{aligned}
 D_P = 1, Z_P = 0, W_P = 1 &\Rightarrow \\
 \frac{\mathbf{M}_P(0^\circ)}{T_P} &= \begin{pmatrix} 1 & 1 & 0 & 0 \\ 1 & 1 & 0 & 0 \\ 0 & 0 & 0 & 0 \\ 0 & 0 & 0 & 0 \end{pmatrix} = \begin{vmatrix} 1 & & & \\ & 1 & & \\ & & 1 & \\ & & & 1 \end{vmatrix}
 \end{aligned} \tag{S.10.8.1}$$

$$\begin{aligned}
 \frac{\mathbf{M}_P(x\phi)}{T_P} &= \frac{\mathbf{R}(x\phi) \mathbf{M}_P \mathbf{R}(-x\phi)}{T_P} = \\
 &= \begin{pmatrix} 1 & 0 & 0 & 0 \\ 0 & c_{2\phi} & -xS_{2\phi} & 0 \\ 0 & xS_{2\phi} & c_{2\phi} & 0 \\ 0 & 0 & 0 & 1 \end{pmatrix} \begin{vmatrix} 1 & & & \\ & 1 & & \\ & & 1 & \\ & & & 1 \end{vmatrix} \begin{pmatrix} 1 & 0 & 0 & 0 \\ 0 & c_{2\phi} & xS_{2\phi} & 0 \\ 0 & -xS_{2\phi} & c_{2\phi} & 0 \\ 0 & 0 & 0 & 1 \end{pmatrix} = \\
 &= \begin{pmatrix} 1 & c_{2\phi} & xS_{2\phi} & 0 \\ c_{2\phi} & c_{2\phi}^2 & xS_{2\phi} c_{2\phi} & 0 \\ xS_{2\phi} & xS_{2\phi} c_{2\phi} & s_{2\phi}^2 & 0 \\ 0 & 0 & 0 & 0 \end{pmatrix} = \begin{vmatrix} 1 & & & \\ c_{2\phi} & & & \\ xS_{2\phi} & & & \\ 0 & & & 0 \end{vmatrix}
 \end{aligned} \tag{S.10.8.2}$$

$$1 \quad \frac{\mathbf{M}_p(x45^\circ)}{T_p} = \begin{pmatrix} 1 & 0 & x & 0 \\ 0 & 0 & 0 & 0 \\ x & 0 & 1 & 0 \\ 0 & 0 & 0 & 0 \end{pmatrix} = \left| \begin{array}{c|c} 1 & 1 \\ 0 & 0 \\ x & x \\ 0 & 0 \end{array} \right| \quad (\text{S.10.8.3})$$

$$2 \quad \frac{\mathbf{M}_p(90^\circ)}{T_p} = \begin{pmatrix} 1 & -1 & 0 & 0 \\ -1 & 1 & 0 & 0 \\ 0 & 0 & 0 & 0 \\ 0 & 0 & 0 & 0 \end{pmatrix} = \left| \begin{array}{c|c} 1 & 1 \\ -1 & -1 \\ 0 & 0 \\ 0 & 0 \end{array} \right| \quad (\text{S.10.8.4})$$

$$D_p = 1, Z_p = 0, W_p = 1 \Rightarrow$$

$$3 \quad \frac{\mathbf{M}_p(45^\circ - x45^\circ)}{T_p} = \begin{pmatrix} 1 & x & 0 & 0 \\ x & 1 & 0 & 0 \\ 0 & 0 & 0 & 0 \\ 0 & 0 & 0 & 0 \end{pmatrix} = \left| \begin{array}{c|c} 1 & 1 \\ x & x \\ 0 & 0 \\ 0 & 0 \end{array} \right| \quad (\text{S.10.8.5})$$

$$D_p = 1, Z_p = 0, W_p = 1 \Rightarrow$$

$$\mathbf{M}_p(x45^\circ + \varepsilon) = \mathbf{R}(+\varepsilon)\mathbf{M}_p(x45^\circ)\mathbf{R}(-\varepsilon) =$$

$$4 \quad = T_p \begin{pmatrix} 1 & -xS_{2\varepsilon} & xC_{2\varepsilon} & 0 \\ -xS_{2\varepsilon} & S_{2\varepsilon}^2 & -S_{2\varepsilon}C_{2\varepsilon} & 0 \\ xC_{2\varepsilon} & -S_{2\varepsilon}C_{2\varepsilon} & C_{2\varepsilon}^2 & 0 \\ 0 & 0 & 0 & 0 \end{pmatrix} = T_p \left| \begin{array}{c|c} 1 & 1 \\ -xS_{2\varepsilon} & -xS_{2\varepsilon} \\ xC_{2\varepsilon} & xC_{2\varepsilon} \\ 0 & 0 \end{array} \right| \quad (\text{S.10.8.6})$$

$$D_p = 1, Z_p = 0, W_p = 1 \Rightarrow$$

$$5 \quad \frac{\mathbf{M}_p(x45^\circ + \varepsilon)\mathbf{I}_{in}}{T_p\mathbf{I}_{in}} = \left| \begin{array}{c|c} 1 & 1 \\ -xS_{2\varepsilon} & -xS_{2\varepsilon} \\ xC_{2\varepsilon} & xC_{2\varepsilon} \\ 0 & 0 \end{array} \right| \left| \begin{array}{c} i_{in} \\ q_{in} \\ u_{in} \\ v_{in} \end{array} \right| = \left| \begin{array}{c} 1 \\ -xS_{2\varepsilon} \\ xC_{2\varepsilon} \\ 0 \end{array} \right| \left[ i_{in} - x(S_{2\varepsilon}q_{in} - C_{2\varepsilon}u_{in}) \right] \quad (\text{S.10.8.7})$$

$$\frac{\mathbf{M}_p(x45^\circ + \varepsilon)\mathbf{F}(a)\mathbf{I}_{in}}{T_p\mathbf{F}_{11}\mathbf{I}_{in}} =$$

$$6 \quad = \left| \begin{array}{c|c} 1 & 1 \\ -xS_{2\varepsilon} & -xS_{2\varepsilon} \\ xC_{2\varepsilon} & xC_{2\varepsilon} \\ 0 & 0 \end{array} \right| \left| \begin{pmatrix} 1 & 0 & 0 & 0 \\ 0 & a & 0 & 0 \\ 0 & 0 & -a & 0 \\ 0 & 0 & 0 & 1-2a \end{pmatrix} \right| \left| \begin{array}{c} i_{in} \\ q_{in} \\ u_{in} \\ v_{in} \end{array} \right| = \left| \begin{array}{c} 1 \\ -xS_{2\varepsilon} \\ xC_{2\varepsilon} \\ 0 \end{array} \right| \left[ i_{in} - xa(S_{2\varepsilon}q_{in} + C_{2\varepsilon}u_{in}) \right] \quad (\text{S.10.8.8})$$



$$\frac{\mathbf{F}(a)\mathbf{M}_P(x45^\circ + \varepsilon)\mathbf{I}_{in}}{T_P F_{11} I_{in}} =$$

$$1 \quad = \begin{pmatrix} 1 & 0 & 0 & 0 \\ 0 & a & 0 & 0 \\ 0 & 0 & -a & 0 \\ 0 & 0 & 0 & 1-2a \end{pmatrix} \begin{matrix} \left| \begin{matrix} 1 \\ -xS_{2\varepsilon} \\ xC_{2\varepsilon} \\ 0 \end{matrix} \right\rangle \\ \left\langle \begin{matrix} 1 \\ -xS_{2\varepsilon} \\ xC_{2\varepsilon} \\ 0 \end{matrix} \right| \end{matrix} \begin{matrix} \left| \begin{matrix} i_{in} \\ q_{in} \\ u_{in} \\ v_{in} \end{matrix} \right\rangle \\ \left\langle \begin{matrix} i_{in} \\ q_{in} \\ u_{in} \\ v_{in} \end{matrix} \right| \end{matrix} = \begin{matrix} \left| \begin{matrix} 1 \\ -xas_{2\varepsilon} \\ -xac_{2\varepsilon} \\ 0 \end{matrix} \right\rangle \\ \left\langle \begin{matrix} i_{in} - x(s_{2\varepsilon}q_{in} - c_{2\varepsilon}u_{in}) \end{matrix} \right| \end{matrix} \quad (S.10.8.9)$$

2 For the  $0^\circ$  and  $90^\circ$  measurements with a perfect polariser  $\mathbf{M}_P$  we get from Eq. (S.10.8.1) and  
3 Eq. (S.12.2)

for  $D_P = 1, Z_P = 0, W_P = 1$

$$\mathbf{M}_P(-x45^\circ + 45^\circ + \varepsilon)\mathbf{I}_{in} =$$

$$4 \quad = T_P I_{in} \begin{pmatrix} 1 & xC_{2\varepsilon} & xS_{2\varepsilon} & 0 \\ xC_{2\varepsilon} & c_{2\varepsilon}^2 & s_{2\varepsilon}c_{2\varepsilon} & 0 \\ xS_{2\varepsilon} & s_{2\varepsilon}c_{2\varepsilon} & s_{2\varepsilon}^2 & 0 \\ 0 & 0 & 0 & 0 \end{pmatrix} \begin{matrix} \left| \begin{matrix} i_{in} \\ q_{in} \\ u_{in} \\ v_{in} \end{matrix} \right\rangle \\ \left\langle \begin{matrix} i_{in} \\ q_{in} \\ u_{in} \\ v_{in} \end{matrix} \right| \end{matrix} = T_P I_{in} \begin{matrix} \left| \begin{matrix} i_{in} + x(c_{2\varepsilon}q_{in} - s_{2\varepsilon}u_{in}) \\ xC_{2\varepsilon}i_{in} + c_{2\varepsilon}^2q_{in} + s_{2\varepsilon}c_{2\varepsilon}u_{in} \\ xS_{2\varepsilon}i_{in} + s_{2\varepsilon}c_{2\varepsilon}q_{in} + s_{2\varepsilon}^2u_{in} \\ 0 \end{matrix} \right\rangle \\ \left\langle \begin{matrix} i_{in} + x(c_{2\varepsilon}q_{in} - s_{2\varepsilon}u_{in}) \end{matrix} \right| \end{matrix} = \quad (S.10.8.10)$$

$$= T_P I_{in} \begin{matrix} \left| \begin{matrix} i_{in} + x(c_{2\varepsilon}q_{in} - s_{2\varepsilon}u_{in}) \\ xC_{2\varepsilon}i_{in} + c_{2\varepsilon}(c_{2\varepsilon}q_{in} - s_{2\varepsilon}u_{in}) \\ xS_{2\varepsilon}i_{in} + s_{2\varepsilon}(c_{2\varepsilon}q_{in} - s_{2\varepsilon}u_{in}) \\ 0 \end{matrix} \right\rangle \\ \left\langle \begin{matrix} i_{in} + x(c_{2\varepsilon}q_{in} - s_{2\varepsilon}u_{in}) \end{matrix} \right| \end{matrix} \begin{matrix} \left| \begin{matrix} 1 \\ xC_{2\varepsilon} \\ xS_{2\varepsilon} \\ 0 \end{matrix} \right\rangle \\ \left\langle \begin{matrix} 1 \\ xC_{2\varepsilon} \\ xS_{2\varepsilon} \\ 0 \end{matrix} \right| \end{matrix}$$

## 5 S.10.9 Two rotated retarding linear diattenuators

$$\mathbf{M}_A(\phi)\mathbf{M}_O(\gamma) =$$

$$6 \quad = \mathbf{R}(\phi)\mathbf{M}_A\mathbf{R}(-\phi)\mathbf{R}(\gamma)\mathbf{M}_O \quad \mathbf{R}(-\gamma) =$$

$$= \mathbf{R}(\phi)\mathbf{M}_A \quad \mathbf{R}(\gamma - \phi)\mathbf{M}_O \quad \mathbf{R}(-\gamma) =$$

$$= \mathbf{R}(\phi)\mathbf{M}_A \quad \mathbf{R}(\gamma - \phi)\mathbf{M}_O \quad \mathbf{R}(-\gamma)\mathbf{R}(\phi)\mathbf{R}(-\phi) =$$

$$= \mathbf{R}(\phi)\mathbf{M}_A \quad \mathbf{R}(\gamma - \phi)\mathbf{M}_O \quad \mathbf{R}(\phi - \gamma)\mathbf{R}(-\phi) =$$

$$= \mathbf{R}(\phi)\mathbf{M}_A \quad \mathbf{M}_O(\gamma - \phi)\mathbf{R}(-\phi)$$

$$(S.10.9.1)$$

$$\frac{\mathbf{M}_A(\phi)\mathbf{M}_O(\gamma)}{T_A T_O} =$$

$$7 \quad = \begin{pmatrix} 1 & c_{2\phi}D_A & s_{2\phi}D_A & 0 \\ c_{2\phi}D_A & 1 - s_{2\phi}^2W_A & s_{2\phi}c_{2\phi}W_A & -s_{2\phi}Z_A S_A \\ s_{2\phi}D_A & s_{2\phi}c_{2\phi}W_A & 1 - c_{2\phi}^2W_A & c_{2\phi}Z_A S_A \\ 0 & s_{2\phi}Z_A S_A & -c_{2\phi}Z_A S_A & Z_A c_A \end{pmatrix} \begin{pmatrix} 1 & c_{2\gamma}D_O & s_{2\gamma}D_O & 0 \\ c_{2\gamma}D_O & 1 - s_{2\gamma}^2W_O & s_{2\gamma}c_{2\gamma}W_O & -s_{2\gamma}Z_O S_O \\ s_{2\gamma}D_O & s_{2\gamma}c_{2\gamma}W_O & 1 - c_{2\gamma}^2W_O & c_{2\gamma}Z_O S_O \\ 0 & s_{2\gamma}Z_O S_O & -c_{2\gamma}Z_O S_O & Z_O c_O \end{pmatrix} \quad (S.10.9.2)$$

1 The first row vector of Eq. (S.10.9.2)

$$\begin{aligned}
 & \frac{\langle \mathbf{M}_A(\phi) \mathbf{M}_O(\gamma) \rangle}{T_S T_O} = \\
 2 & \left\langle \begin{array}{c} 1 + c_{2\gamma-2\phi} D_A D_O \\ c_{2\gamma} D_O + (1 - s_{2\gamma}^2 W_O) c_{2\phi} D_A + s_{2\gamma} c_{2\gamma} W_O s_{2\phi} D_A \\ s_{2\gamma} (D_O + c_{2\gamma} W_O c_{2\phi} D_A) + (1 - c_{2\gamma}^2 W_O) s_{2\phi} D_A \\ -s_{2\gamma} Z_O s_O c_{2\phi} D_A + c_{2\gamma} Z_O s_O s_{2\phi} D_A \end{array} \right\rangle = \left\langle \begin{array}{c} 1 + c_{2\gamma-2\phi} D_A D_O \\ c_{2\gamma} D_O + (c_{2\phi} - s_{2\gamma} s_{2\gamma-2\phi} W_O) D_A \\ s_{2\gamma} D_O + (s_{2\phi} + c_{2\gamma} s_{2\gamma-2\phi} W_O) D_A \\ -s_{2\gamma-2\phi} Z_O s_O D_A \end{array} \right\rangle \quad (\text{S.10.9.3})
 \end{aligned}$$

### 3 **S.10.10 Cleaned analyser (polarising beam-splitter with additional** 4 **polarising sheet filters)**

5 The intensity transmission of analysers is proportional to a certain state of polarisation before  
6 the analyser, with arbitrary state of polarisation behind, while the output of polarisers is a  
7 certain state of polarisation regardless which state of polarisation exists before the polariser  
8 (Lu and Chipman, 1996). Here we use a polarising sheet filter, which is a depolarising  
9 analyser and a depolarising polariser at the same time, to get rid of the cross talk of the  
10 polarising beam-splitter. The combined matrix of a polarising sheet filter  $\mathbf{M}_A$  behind the  
11 polarising beam-splitter  $\mathbf{M}_S$  is again the matrix of a retarding linear diattenuator, which we  
12 call a cleaned polarising beam-splitter. If  $\mathbf{M}_A$  is rotated (misaligned) by  $\phi$  we get from Eq.  
13 (S.10.9.3)

$$\gamma = 0 \Rightarrow$$

$$14 \quad \frac{\langle \mathbf{M}_A(\phi) \mathbf{M}_S(0) \rangle}{T_A T_S} = \langle 1 + c_{2\phi} D_A D_S \quad D_S + c_{2\phi} D_A \quad s_{2\phi} D_A Z_S c_S \quad s_{2\phi} D_A Z_S s_S \rangle \quad (\text{S.10.10.1})$$

$$\gamma = 0, \phi = 0 \Rightarrow$$

$$15 \quad \frac{\langle \mathbf{M}_A(0) \mathbf{M}_S(0) \rangle}{T_A T_S} = \langle 1 + D_A D_S \quad D_S + D_A \quad 0 \quad 0 \rangle \quad (\text{S.10.10.2})$$

$$\gamma = 0, \phi = 90^\circ \Rightarrow$$

$$16 \quad \frac{\langle \mathbf{M}_A(90^\circ) \mathbf{M}_S(0) \rangle}{T_A T_S} = \langle 1 - D_A D_S \quad D_S - D_A \quad 0 \quad 0 \rangle \quad (\text{S.10.10.3})$$

17 Typically the manufacturers' terminology is as Eq. (S.10.10.4) and their specifications for  
18 polarising sheet filters are the transmission of two crossed filters Eq. (S.10.10.6) and that of  
19 two parallel filters Eq. (S.10.10.7) of the same type.

$$1 \quad T_A^p = k_1 \quad \text{and} \quad T_A^s = k_2 \quad \Rightarrow \quad (\text{S.10.10.4})$$

$$2 \quad D_A = \frac{k_1 - k_2}{k_1 + k_2}, \quad Z_A = \frac{2\sqrt{k_1 k_2}}{k_1 + k_2}, \quad T_A = \frac{k_1 + k_2}{2} \quad (\text{S.10.10.5})$$

$$3 \quad T_{cross} = H_{90} = k_1 k_2 = T_A \sqrt{1 - D_A^2} \quad (\text{S.10.10.6})$$

$$4 \quad T_{parallel} = H_0 = 0.5(k_1^2 + k_2^2) = T_A \sqrt{1 + D_A^2} \quad (\text{S.10.10.7})$$

5 For the extinction ratio  $\rho$  (see Bennett (2009a), Sect. 12.4) and its inverse, i.e. the contrast  
6 ratio or transmission ratio, different definitions, as in Eq. (S.10.10.9), can be found in  
7 manufacturers' descriptions, which is sometimes confusing. However, usually  $k_2 \ll k_1$ , and  
8 the given extinction ratios are then to be understood as "on the order of", irrespective of the  
9 used formula.

$$10 \quad \rho = \frac{k_2}{k_1} \quad (\text{S.10.10.8})$$

$$k_2 \ll k_1 \Rightarrow$$

$$11 \quad \frac{T_{cross}}{T_{parallel}} = \frac{H_{90}}{H_0} = \frac{k_1 k_2}{0.5(k_1^2 + k_2^2)} \approx 2\rho \quad (\text{S.10.10.9})$$

$$\begin{aligned} D_T^\# &= \frac{D_T + D_A}{1 + D_T D_A} = \frac{T_T^p k_1 - T_T^s k_2}{T_T^p k_1 + T_T^s k_2}, & D_R^\# &= \frac{D_R - D_A}{1 - D_R D_A} = \frac{T_R^p k_2 - T_R^s k_1}{T_R^p k_2 + T_R^s k_1} \\ T_T^\# &= T_T T_A (1 + D_T D_A) = 0.5(T_T^p k_1 + T_T^s k_2), & T_R^\# &= T_R T_A (1 - D_R D_A) = 0.5(T_R^p k_2 + T_R^s k_1) \\ Z_T^\# &= \frac{Z_T Z_A}{1 + D_T D_A} = \frac{2\sqrt{T_T^p k_1 T_T^s k_2}}{T_T^p k_1 + T_T^s k_2}, & Z_R^\# &= \frac{Z_R Z_A}{1 - D_R D_A} = \frac{2\sqrt{T_R^s k_1 T_R^p k_2}}{T_R^p k_2 + T_R^s k_1} \end{aligned}$$

$$12 \quad (\text{S.10.10.10})$$

13 For an ideal (cleaned) analyser  $\mathbf{M}_A$  with total extinction ( $k_2 = 0$ ) we get from Eqs. (S.10.10.3)  
14 and (S.10.10.10)

$$15 \quad \text{with } k_2 = 0, D_A = 1, Z_A = 0 \Rightarrow \quad (\text{S.10.10.11})$$

$$T_T^\# = 0.5 T_T^p k_1, \quad T_R^\# = 0.5 T_R^s k_1, \quad D_T^\# = +1, \quad D_R^\# = -1, \quad Z_S^\# = 0$$

$$16 \quad \eta = \frac{\eta_R T_R^\#}{\eta_T T_T^\#} = \frac{\eta_R T_R^s}{\eta_T T_T^p} \quad (\text{S.10.10.12})$$

17 **General:**

$$\langle \mathbf{M}_{21} | \equiv \langle \mathbf{M}_2(0^\circ) \mathbf{M}_1(0^\circ) | = T_2 T_1 \langle 1 + D_2 D_1 \quad D_2 + D_1 \quad 0 \quad 0 | = T_{21} \langle 1 \quad D_{21} \quad 0 \quad 0 |$$

$$D_1 = \frac{T_1^p - T_1^s}{T_1^p + T_1^s}$$

$$T_1 = 0.5(T_1^p + T_1^s)$$

$$1 \quad D_{21} = \frac{D_2 + D_1}{1 + D_2 D_1} = \frac{T_2^p T_1^p - T_2^s T_1^s}{T_2^p T_1^p + T_2^s T_1^s}, \quad (\text{S.10.10.13})$$

$$T_{21} = T_2 T_1 (1 + D_2 D_1) = 0.5(T_2^p T_1^p + T_2^s T_1^s)$$

$$Z_{21} = \frac{Z_2 Z_1}{1 + D_2 D_1} = \frac{2\sqrt{T_2^p T_1^p T_2^s T_1^s}}{T_2^p T_1^p + T_2^s T_1^s}$$

$$2 \quad 1 - D_1 = \frac{T_1^s}{T_1}, 1 + D_1 = \frac{T_1^p}{T_1} \quad (\text{S.10.10.14})$$

$$D_{\text{SyO}} = \frac{D_o + y D_s}{1 + y D_s D_o} = \frac{(1+y)[T_o^p T_s^p - T_o^s T_s^s] + (1-y)[T_o^p T_s^s - T_o^s T_s^p]}{(1+y)[T_o^p T_s^p + T_o^s T_s^s] + (1-y)[T_o^p T_s^s + T_o^s T_s^p]}$$

$$T_{\text{SyO}} = T_s T_o (1 + y D_s D_o) = 0.25 \{ (1+y)[T_o^p T_s^p + T_o^s T_s^s] + (1-y)[T_o^p T_s^s + T_o^s T_s^p] \}$$

$$y = +1 \Rightarrow D_{s+o} = \frac{T_o^p T_s^p - T_o^s T_s^s}{T_o^p T_s^p + T_o^s T_s^s}, \quad T_{s+o} = 0.5(T_o^p T_s^p + T_o^s T_s^s), \quad T_{s+o}^p = T_o^p T_s^p, \quad T_{s+o}^s = T_o^s T_s^s$$

$$y = -1 \Rightarrow D_{s-o} = \frac{T_o^p T_s^s - T_o^s T_s^p}{T_o^p T_s^s + T_o^s T_s^p}, \quad T_{s-o} = 0.5(T_o^p T_s^s + T_o^s T_s^p), \quad T_{s-o}^p = T_o^p T_s^s, \quad T_{s-o}^s = T_o^s T_s^p$$

$$3 \quad (\text{S.10.10.15})$$

$$D_s = \pm 1 \wedge y = \pm 1 \Rightarrow D_s^2 = y^2 = 1 \Rightarrow$$

$$4 \quad D_{\text{SyO}} = \frac{D_o + y D_s}{1 + y D_s D_o} = \frac{1}{y D_s} \frac{y D_s D_o + 1}{1 + y D_s D_o} = \frac{1}{y D_s} = y D_s \quad (\text{S.10.10.16})$$

$$5 \quad 1 - D_{\text{SyO}} = \frac{T_{\text{SyO}}^s}{T_{\text{SyO}}}, 1 + D_{\text{SyO}} = \frac{T_{\text{SyO}}^p}{T_{\text{SyO}}} \quad (\text{S.10.10.17})$$

## 6 **S.10.11 Retarder**

7 A retarder is a retarding linear diattenuator (Sect. S.10.3ff) without diattenuation (see  
8 Chipman (2009b)):

$$D_o = 0, Z_o = 1 \quad (\text{without absorption } T_o = 1) \Rightarrow$$

$$9 \quad M_{\text{ret}} = \begin{pmatrix} 1 & 0 & 0 & 0 \\ 0 & 1 & 0 & 0 \\ 0 & 0 & c_o & s_o \\ 0 & 0 & -s_o & c_o \end{pmatrix} \quad (\text{S.10.11.1})$$

1 **S.10.12 Rotated retarder**

2 Rotated retarder with

$$D_o = 0 \Rightarrow Z_o = \sqrt{1 - D_o^2} = 1, W_o = 1 - Z_o c_o = 1 - c_o \Rightarrow$$

$$\mathbf{M}_{Ret}(x\phi)/T_{Ret} = \mathbf{R}(x\phi)\mathbf{M}_o\mathbf{R}(-x\phi) =$$

$$3 = \begin{pmatrix} 1 & 0 & 0 & 0 \\ 0 & 1 - s_{2\phi}^2(1 - c_o) & xs_{2\phi}c_{2\phi}(1 - c_o) & -xs_{2\phi}s_o \\ 0 & xs_{2\phi}c_{2\phi}(1 - c_o) & 1 - c_{2\phi}^2(1 - c_o) & c_{2\phi}s_o \\ 0 & xs_{2\phi}s_o & -c_{2\phi}s_o & c_o \end{pmatrix} \quad (\text{S.10.12.1})$$

with

$$1 - s_{2\phi}^2(1 - c_o) = c_{2\phi}^2 + s_{2\phi}^2 c_o$$

$$1 - c_{2\phi}^2(1 - c_o) = s_{2\phi}^2 + c_{2\phi}^2 c_o$$

4 **S.10.13 Rotated  $\lambda/2$  plate**

5 Retarder Eq.(S.10.12.1) with

$$6 \Delta_o = 180^\circ \Rightarrow c_o = -1, s_o = 0, D_o = 0, Z_o = \sqrt{1 - D_o^2} = 1, W_o = 1 - Z_o c_o = 2 \quad (\text{S.10.13.1})$$

$$\mathbf{M}_{HW}(\theta)/T_{HW} =$$

$$7 = \begin{pmatrix} 1 & 0 & 0 & 0 \\ 0 & 1 - 2s_{2\theta}^2 & 2c_{2\theta}s_{2\theta} & 0 \\ 0 & 2c_{2\theta}s_{2\theta} & 1 - 2c_{2\theta}^2 & 0 \\ 0 & 0 & 0 & -1 \end{pmatrix} = \begin{pmatrix} 1 & 0 & 0 & 0 \\ 0 & c_{4\theta} & s_{4\theta} & 0 \\ 0 & s_{4\theta} & -c_{4\theta} & 0 \\ 0 & 0 & 0 & -1 \end{pmatrix} = \mathbf{R}(2\theta) \begin{pmatrix} 1 & 0 & 0 & 0 \\ 0 & 1 & 0 & 0 \\ 0 & 0 & -1 & 0 \\ 0 & 0 & 0 & -1 \end{pmatrix} \quad (\text{S.10.13.2})$$

8 The rotation of a  $\lambda/2$  plate by  $\phi$  rotates the Stokes vector by twice the rotation  $\phi$  and  
 9 additionally inverts the circular polarisation component. This is equivalent to a mirror  
 10 followed by a rotation of the coordinate system by  $2\theta$ . Please note, that the rotator and mirror  
 11 matrices don't commute (compare Eqs. (S.6.2.1) ff).

12  $\lambda/2$ -retarder Eq.(S.10.12.1) at  $0^\circ$  and  $22.5^\circ$  with phase shift error  $2\omega$

$$D_o = 0 \Rightarrow Z_o = \sqrt{1 - D_o^2} = 1$$

$$13 \Delta_o = \pi + 2\omega \Rightarrow c_o \approx -1 + 2\omega^2, s_o \approx 2\omega \Rightarrow W_o = 1 - Z_o c_o \approx 2 - 2\omega^2 \quad (\text{S.10.13.3})$$

$$\phi = 22.5^\circ \Rightarrow s_{2\phi} = c_{2\phi} = \frac{1}{\sqrt{2}}$$

$$1 \quad \mathbf{M}_{HW}(0^\circ, 2\omega)/T_{HW} \approx \begin{pmatrix} 1 & 0 & 0 & 0 \\ 0 & 1 & 0 & 0 \\ 0 & 0 & -1+2\omega^2 & 2\omega \\ 0 & 0 & -2\omega & -1+2\omega^2 \end{pmatrix} \quad (\text{S.10.13.4})$$

$$2 \quad \mathbf{M}_{HW}(x22.5^\circ, 2\omega)/T_{HW} \approx \begin{pmatrix} 1 & 0 & 0 & 0 \\ 0 & \omega^2 & x(1-\omega^2) & -x\sqrt{2}\omega \\ 0 & x(1-\omega^2) & \omega^2 & \sqrt{2}\omega \\ 0 & x\sqrt{2}\omega & -\sqrt{2}\omega & -1+2\omega^2 \end{pmatrix} \quad (\text{S.10.13.5})$$

$$3 \quad \langle \mathbf{A}_s(y) | \mathbf{M}_{HW}(x22.5^\circ, 2\omega) \approx \begin{pmatrix} 1 & 0 & 0 & 0 \\ 0 & \omega^2 & x(1-\omega^2) & -x\sqrt{2}\omega \\ 0 & x(1-\omega^2) & \omega^2 & \sqrt{2}\omega \\ 0 & x\sqrt{2}\omega & -\sqrt{2}\omega & -1+2\omega^2 \end{pmatrix} = \begin{pmatrix} 1 \\ -y\omega^2 D_s \\ -xy(1-\omega^2) D_s \\ xy\sqrt{2}\omega D_s \end{pmatrix} =$$

$$= \begin{pmatrix} 1 \\ 0 \\ -xy D_s \\ 0 \end{pmatrix} + y\omega D_s \begin{pmatrix} 0 \\ -\omega \\ x\omega \\ x\sqrt{2} \end{pmatrix} \quad (\text{S.10.13.6})$$

#### 4 S.10.14 Rotated $\lambda/2$ plate for $\Delta 90$ -calibration including error $\varepsilon$

$$5 \quad \frac{\mathbf{M}_{HW}(x22.5^\circ + \varepsilon/2)}{T_{HW}} = \begin{pmatrix} 1 & 0 & 0 & 0 \\ 0 & -x s_{2\varepsilon} & x c_{2\varepsilon} & 0 \\ 0 & x c_{2\varepsilon} & x s_{2\varepsilon} & 0 \\ 0 & 0 & 0 & -1 \end{pmatrix} =$$

$$= \begin{pmatrix} 1 & 0 & 0 & 0 \\ 0 & -x s_{2\varepsilon} & -x c_{2\varepsilon} & 0 \\ 0 & x c_{2\varepsilon} & -x s_{2\varepsilon} & 0 \\ 0 & 0 & 0 & 1 \end{pmatrix} \begin{pmatrix} 1 & 0 & 0 & 0 \\ 0 & 1 & 0 & 0 \\ 0 & 0 & -1 & 0 \\ 0 & 0 & 0 & -1 \end{pmatrix} = \mathbf{R}(x45^\circ + \varepsilon) \mathbf{M}_M \quad (\text{S.10.14.1})$$

#### 6 S.10.15 Rotation calibrator

7 The mechanical rotator (Sect. S.10.2) and the  $\lambda/2$ - rotator (Sects. S.10.13, S.10.14) can be  
8 combined to

$$\frac{\mathbf{M}_{rot}(\phi, h)}{T_{rot}} = \mathbf{R}(\phi) \mathbf{M}_h = \begin{pmatrix} 1 & 0 & 0 & 0 \\ 0 & c_{2\phi} & -s_{2\phi} & 0 \\ 0 & s_{2\phi} & c_{2\phi} & 0 \\ 0 & 0 & 0 & 1 \end{pmatrix} \begin{pmatrix} 1 & 0 & 0 & 0 \\ 0 & 1 & 0 & 0 \\ 0 & 0 & h & 0 \\ 0 & 0 & 0 & h \end{pmatrix} = \begin{pmatrix} 1 & 0 & 0 & 0 \\ 0 & c_{2\phi} & -hs_{2\phi} & 0 \\ 0 & s_{2\phi} & hc_{2\phi} & 0 \\ 0 & 0 & 0 & h \end{pmatrix} =$$

$$\begin{pmatrix} 1 & 0 & 0 & 0 \\ 0 & 1 & 0 & 0 \\ 0 & 0 & h & 0 \\ 0 & 0 & 0 & h \end{pmatrix} \begin{pmatrix} 1 & 0 & 0 & 0 \\ 0 & c_{2\phi} & -hs_{2\phi} & 0 \\ 0 & hs_{2\phi} & c_{2\phi} & 0 \\ 0 & 0 & 0 & 1 \end{pmatrix} = \begin{pmatrix} 1 & 0 & 0 & 0 \\ 0 & 1 & 0 & 0 \\ 0 & 0 & h & 0 \\ 0 & 0 & 0 & h \end{pmatrix} \begin{pmatrix} 1 & 0 & 0 & 0 \\ 0 & c_{h2\phi} & -s_{h2\phi} & 0 \\ 0 & s_{h2\phi} & c_{h2\phi} & 0 \\ 0 & 0 & 0 & 1 \end{pmatrix}$$

with  $h = \pm 1$

1 (S.10.15.1)

2 where  $T_{rot}$  is the transmission of the rotation calibrator for unpolarised light, which equals one  
3 for the mechanical rotator. For the mechanical rotator we use  $h = +1$ , and for the  $\lambda/2$ -rotator  $h$   
4  $= -1$ , and  $\phi = 2\theta$  is two times the actual rotation  $\theta$  of the  $\lambda/2$ -plate, as well as  $\varepsilon$  is two times  
5 the actual error angle of the  $\lambda/2$ -plate. With Eq. (S.10.15.1) we get Eq. (S.10.15.2) for the  
6 rotation calibrator  $\mathbf{M}_{rot}$  at  $\pm 45^\circ$ .

$$\mathbf{M}_{rot}(x45^\circ + \varepsilon, h) / T_{rot} = \mathbf{R}(x45^\circ + \varepsilon) \mathbf{M}_h = \mathbf{R}(x45^\circ) \mathbf{R}(\varepsilon) \mathbf{M}_h =$$

$$7 = \begin{pmatrix} 1 & 0 & 0 & 0 \\ 0 & 0 & -x & 0 \\ 0 & x & 0 & 0 \\ 0 & 0 & 0 & 1 \end{pmatrix} \begin{pmatrix} 1 & 0 & 0 & 0 \\ 0 & c_{2\varepsilon} & -s_{2\varepsilon} & 0 \\ 0 & s_{2\varepsilon} & c_{2\varepsilon} & 0 \\ 0 & 0 & 0 & 1 \end{pmatrix} \begin{pmatrix} 1 & 0 & 0 & 0 \\ 0 & 1 & 0 & 0 \\ 0 & 0 & h & 0 \\ 0 & 0 & 0 & h \end{pmatrix} = \begin{pmatrix} 1 & 0 & 0 & 0 \\ 0 & -xs_{2\varepsilon} & -xhc_{2\varepsilon} & 0 \\ 0 & xc_{2\varepsilon} & -xhs_{2\varepsilon} & 0 \\ 0 & 0 & 0 & h \end{pmatrix} \quad (S.10.15.2)$$

with  $x, h = \pm 1$

8 The error rotation  $\varepsilon$  can be separated as in Eq. (S.10.15.3) using the explanations in Sect.  
9 S.6.3 .

$$10 \quad \mathbf{R}(x45^\circ + \varepsilon) \mathbf{M}_h = \mathbf{R}(x45^\circ) \mathbf{R}(\varepsilon) \mathbf{M}_h = \mathbf{R}(x45^\circ) \mathbf{M}_h \mathbf{R}(h\varepsilon) \quad (S.10.15.3)$$

### 11 **S.10.16 $\lambda/4$ plate (QWP)**

12 From Eq. (S.10.6.1): QWP without diattenuation, with phase shift error  $\omega$ .

$$\Delta_{QW} = 90^\circ + \omega \Rightarrow c_Q = -s_\omega, \quad s_Q = c_\omega$$

$$\phi = x45^\circ + \varepsilon \Rightarrow c_{2\phi} \rightarrow -zs_{2\varepsilon}, \quad s_{2\phi} \rightarrow xc_{2\varepsilon}$$

$$13 \quad D_{QW} = 0, Z_{QW} = 1, W_Q = (1 - c_{QW}) = (1 + s_\omega) \quad (S.10.16.1)$$

$$(1 - c_{2\varepsilon}^2 W_{QW}) = s_{2\varepsilon}^2 + c_{2\varepsilon}^2 c_{QW} = (s_{2\varepsilon}^2 - c_{2\varepsilon}^2 s_\omega)$$

$$(1 - s_{2\varepsilon}^2 W_{QW}) = c_{2\varepsilon}^2 + s_{2\varepsilon}^2 c_{QW} = (c_{2\varepsilon}^2 - s_{2\varepsilon}^2 s_\omega)$$

$$D_{QW} = 0, Z_{QW} = 1, W_{QW} = (1 - c_{QW}) = (1 + s_\omega) \Rightarrow$$

$$\frac{\mathbf{M}_{QW}(x45^\circ + \varepsilon, \omega)}{T_{QW}} =$$

$$= \begin{pmatrix} 1 & 0 & 0 & 0 \\ 0 & (1 - c_{2\varepsilon}^2 W_{QW}) & -c_{2\varepsilon} s_{2\varepsilon} W_{QW} & -x c_{2\varepsilon} s_{QW} \\ 0 & -s_{2\varepsilon} c_{2\varepsilon} W_{QW} & (1 - s_{2\varepsilon}^2 W_{QW}) & -x s_{2\varepsilon} s_{QW} \\ 0 & x c_{2\varepsilon} s_{QW} & x s_{2\varepsilon} s_{QW} & c_{QW} \end{pmatrix} =$$

$$1 \quad (S.10.16.2)$$

$$= \begin{pmatrix} 1 & 0 & 0 & 0 \\ 0 & s_{2\varepsilon}^2 - c_{2\varepsilon}^2 s_\omega & -s_{2\varepsilon} c_{2\varepsilon} (1 + s_\omega) & -x c_{2\varepsilon} c_\omega \\ 0 & -s_{2\varepsilon} c_{2\varepsilon} (1 + s_\omega) & c_{2\varepsilon}^2 - s_{2\varepsilon}^2 s_\omega & -x s_{2\varepsilon} c_\omega \\ 0 & x c_{2\varepsilon} c_\omega & x s_{2\varepsilon} c_\omega & -s_\omega \end{pmatrix} =$$

$$= \begin{pmatrix} 1 & 0 & 0 & 0 \\ 0 & 1 - c_{2\varepsilon}^2 (1 + s_\omega) & -c_{2\varepsilon} s_{2\varepsilon} (1 + s_\omega) & -x c_{2\varepsilon} c_\omega \\ 0 & -s_{2\varepsilon} c_{2\varepsilon} (1 + s_\omega) & 1 - s_{2\varepsilon}^2 (1 + s_\omega) & -x s_{2\varepsilon} c_\omega \\ 0 & x c_{2\varepsilon} c_\omega & x s_{2\varepsilon} c_\omega & -s_\omega \end{pmatrix}$$

$$D_{QW} = 0, W_Q = (1 + s_\omega), \varepsilon = 0 \Rightarrow$$

$$2 \quad \frac{\mathbf{M}_{QW}(x45^\circ, \omega)}{T_{QW}} = \begin{pmatrix} 1 & 0 & 0 & 0 \\ 0 & -s_\omega & 0 & -x c_\omega \\ 0 & 0 & 1 & 0 \\ 0 & x c_\omega & 0 & -s_\omega \end{pmatrix}$$

$$(S.10.16.3)$$

### 3 S.10.17 Rotated, ideal $\lambda/4$ plate

$$4 \quad \Delta_o = 90^\circ \Rightarrow c_o = 0, s_o = 1, D_o = 0, Z_o = \sqrt{1 - D_o^2} = 1, W_o = 1 - Z_o c_o = 1$$

(without absorption  $T_{QWP} = 1$ )

$$(S.10.17.1)$$

$$5 \quad \mathbf{M}_{QW}(\phi) = T_{QW} \begin{pmatrix} 1 & 0 & 0 & 0 \\ 0 & c_{2\phi}^2 & s_{2\phi} c_{2\phi} & -s_{2\phi} \\ 0 & s_{2\phi} c_{2\phi} & s_{2\phi}^2 & c_{2\phi} \\ 0 & s_{2\phi} & -c_{2\phi} & 0 \end{pmatrix}$$

$$(S.10.17.2)$$

$$\mathbf{M}_{QW}(x45^\circ + \varepsilon) = \mathbf{R}(x45^\circ + \varepsilon) \mathbf{M}_{QW} \mathbf{R}(-x45^\circ - \varepsilon) =$$

$$6 \quad = T_{QW} \begin{pmatrix} 1 & 0 & 0 & 0 \\ 0 & s_{2\varepsilon}^2 & -s_{2\varepsilon} c_{2\varepsilon} & -x c_{2\varepsilon} \\ 0 & -s_{2\varepsilon} c_{2\varepsilon} & c_{2\varepsilon}^2 & -x s_{2\varepsilon} \\ 0 & x c_{2\varepsilon} & x s_{2\varepsilon} & 0 \end{pmatrix}$$

$$(S.10.17.3)$$



$$1 \quad \frac{\mathbf{M}_{QW}(x45^\circ)}{T_{QW}} = \begin{pmatrix} 1 & 0 & 0 & 0 \\ 0 & 0 & 0 & -x \\ 0 & 0 & 1 & 0 \\ 0 & x & 0 & 0 \end{pmatrix} \quad (\text{S.10.17.4})$$

$$2 \quad \mathbf{M}_{QW}(0) = T_{QW} \begin{pmatrix} 1 & 0 & 0 & 0 \\ 0 & 1 & 0 & 0 \\ 0 & 0 & 0 & 1 \\ 0 & 0 & -1 & 0 \end{pmatrix} \quad (\text{S.10.17.5})$$

$$x \in \{0, \pm 1\}$$

$$3 \quad \mathbf{M}_{QW}(x45^\circ) = T_{QW} \begin{pmatrix} 1 & 0 & 0 & 0 \\ 0 & 1-x^2 & 0 & -x \\ 0 & 0 & x^2 & 1-x^2 \\ 0 & x & -(1-x^2) & 0 \end{pmatrix} \quad (\text{S.10.17.6})$$

$$x \in \{0, \pm 1\}$$

$$4 \quad \mathbf{M}_{QW}(45^\circ - x45^\circ) = T_{QW} \begin{pmatrix} 1 & 0 & 0 & 0 \\ 0 & x^2 & 0 & -(1-x^2) \\ 0 & 0 & 1-x^2 & x \\ 0 & 1-x^2 & -x & 0 \end{pmatrix} \quad (\text{S.10.17.7})$$

## 5 S.10.18 Circular polariser

6 Linear polariser at  $0^\circ$  Eq. (S.10.3.1) and QWP at  $z45^\circ$  Eq. (S.10.16.3) (see Chipman (2009a)  
7 Chap. 15.26).

$$D_{QW} = 0, \quad Z_{QW} = 1, \quad \Delta_{QW} = 90^\circ + \omega \Rightarrow W_{QW} = (1 + s_\omega) =$$

$$8 \quad \frac{\mathbf{M}_{QW}(z45^\circ, \omega) \mathbf{M}_P(0^\circ)}{T_{QW} T_P} = \begin{pmatrix} 1 & 0 & 0 & 0 \\ 0 & -s_\omega & 0 & -z c_\omega \\ 0 & 0 & 1 & 0 \\ 0 & z c_\omega & 0 & -s_\omega \end{pmatrix} \begin{pmatrix} 1 & D_P & 0 & 0 \\ D_P & 1 & 0 & 0 \\ 0 & 0 & Z_P c_P & Z_P s_P \\ 0 & 0 & -Z_P s_P & Z_P c_P \end{pmatrix} = \quad (\text{S.10.18.1})$$

$$= \begin{pmatrix} 1 & D_P & 0 & 0 \\ -s_\omega D_P & -s_\omega & z c_\omega Z_P s_P & -z c_\omega Z_P c_P \\ 0 & 0 & Z_P c_P & Z_P s_P \\ z c_\omega D_P & z c_\omega & s_\omega Z_P s_P & -s_\omega Z_P c_P \end{pmatrix}$$

9 Circular polariser as  $\pm 45^\circ$  calibrator with a QWP with phase shift error  $\omega$  and a real linear  
10 polariser

$$\begin{aligned}
& \frac{[\mathbf{M}_{QW}(z45^\circ, \omega)\mathbf{M}_P(0^\circ)](x45^\circ + \varepsilon)}{T_{QW}T_P} = \\
& \begin{pmatrix} 1 & -xS_{2\varepsilon}D_P & \dots & \dots \\ xS_{2\varepsilon}S_\omega D_P & -S_{2\varepsilon}^2S_\omega + c_{2\varepsilon}(c_{2\varepsilon}c_P + s_{2\varepsilon}zC_\omega S_P)Z_P & \dots & \dots \\ -xc_{2\varepsilon}S_\omega D_P & c_{2\varepsilon}S_{2\varepsilon}S_\omega + c_{2\varepsilon}(s_{2\varepsilon}c_P - c_{2\varepsilon}zC_\omega S_P)Z_P & \dots & \dots \\ zC_\omega D_P & -x(s_{2\varepsilon}zC_\omega + c_{2\varepsilon}S_\omega S_P Z_P) & \dots & \dots \\ \dots & \dots & xc_{2\varepsilon}D_P & 0 \\ \dots & \dots & c_{2\varepsilon}S_{2\varepsilon}S_\omega + s_{2\varepsilon}(c_{2\varepsilon}c_P + s_{2\varepsilon}zC_\omega S_P)Z_P & x(s_{2\varepsilon}zC_\omega c_P - c_{2\varepsilon}S_P)Z_P \\ \dots & \dots & -c_{2\varepsilon}^2S_\omega + s_{2\varepsilon}(s_{2\varepsilon}c_P - c_{2\varepsilon}zC_\omega S_P)Z_P & -x(c_{2\varepsilon}zC_\omega c_P + s_{2\varepsilon}S_P)Z_P \\ \dots & \dots & x(c_{2\varepsilon}zC_\omega - s_{2\varepsilon}S_\omega S_P Z_P) & -S_\omega c_P Z_P \end{pmatrix} \quad (S.10.18.2)
\end{aligned}$$

2 Circular polariser with QWP without phase shift error  $\omega$  and real linear polariser as  $\pm 45^\circ$   
3 calibrator

$$\omega = 0 \Rightarrow$$

$$\begin{aligned}
& \frac{\mathbf{M}_{CP}(z, 0, x45^\circ + \varepsilon)}{T_{CP}} = \frac{[\mathbf{M}_{QW}(z45^\circ, 0)\mathbf{M}_P(0^\circ)](x45^\circ + \varepsilon)}{T_{QW}T_P} = \\
& \begin{pmatrix} 1 & -xS_{2\varepsilon}D_P & xc_{2\varepsilon}D_P & 0 \\ 0 & c_{2\varepsilon}(c_{2\varepsilon}c_P + zS_{2\varepsilon}S_P)Z_P & s_{2\varepsilon}(c_{2\varepsilon}c_P + zS_{2\varepsilon}S_P)Z_P & x(zS_{2\varepsilon}c_P - c_{2\varepsilon}S_P)Z_P \\ 0 & c_{2\varepsilon}(s_{2\varepsilon}c_P - zC_{2\varepsilon}S_P)Z_P & s_{2\varepsilon}(s_{2\varepsilon}c_P - zC_{2\varepsilon}S_P)Z_P & -x(zC_{2\varepsilon}c_P + s_{2\varepsilon}S_P)Z_P \\ zD_P & -xzs_{2\varepsilon} & xzc_{2\varepsilon} & 0 \end{pmatrix} = \\
& \begin{pmatrix} 1 & -xS_{2\varepsilon}D_P & xc_{2\varepsilon}D_P & 0 \\ 0 & c_{2\varepsilon}c_{2\varepsilon-zP}Z_P & s_{2\varepsilon}c_{2\varepsilon-zP}Z_P & xS_{z2\varepsilon-P}Z_P \\ 0 & c_{2\varepsilon}S_{2\varepsilon-zP}Z_P & s_{2\varepsilon}c_{2\varepsilon-zP}Z_P & -xc_{z2\varepsilon-P}Z_P \\ zD_P & -xzs_{2\varepsilon} & xzc_{2\varepsilon} & 0 \end{pmatrix}
\end{aligned}$$

4 (S.10.18.3)

5 Circular polariser with QWP with phase shift error  $\omega$  and ideal linear polariser as  $\pm 45^\circ$   
6 calibrator

$$D_P = 1, Z_P = 0, \Rightarrow$$

$$\begin{aligned}
& \frac{\mathbf{M}_{CP}(z, \omega, x45^\circ + \varepsilon)}{T_{CP}} = \frac{[\mathbf{M}_{QW}(z45^\circ, \omega)\mathbf{M}_P(0^\circ)](x45^\circ + \varepsilon)}{T_{QW}T_P} = \\
& \begin{pmatrix} 1 & -xS_{2\varepsilon} & xc_{2\varepsilon} & 0 \\ xS_{2\varepsilon}S_\omega & -S_{2\varepsilon}^2S_\omega & c_{2\varepsilon}S_{2\varepsilon}S_\omega & 0 \\ -xc_{2\varepsilon}S_\omega & c_{2\varepsilon}S_{2\varepsilon}S_\omega & -c_{2\varepsilon}^2S_\omega & 0 \\ zC_\omega & -xS_{2\varepsilon}zC_\omega & xc_{2\varepsilon}zC_\omega & 0 \end{pmatrix} = \begin{vmatrix} 1 & 1 \\ xS_{2\varepsilon}S_\omega & -xS_{2\varepsilon} \\ -xc_{2\varepsilon}S_\omega & xc_{2\varepsilon} \\ zC_\omega & 0 \end{vmatrix} \quad (S.10.18.4)
\end{aligned}$$

8 Ideal circular polariser as  $\pm 45^\circ$  calibrator (see Eq. (E.27))

with  $D_p = 1, \omega = 0 \Rightarrow$

$$\mathbf{M}_{CP}(z) = \mathbf{M}_{QW}(z45^\circ)\mathbf{M}_P(0^\circ) =$$

$$1 \quad = T_{CP} \begin{pmatrix} 1 & 0 & 0 & 0 \\ 0 & 0 & 0 & -z \\ 0 & 0 & 1 & 0 \\ 0 & z & 0 & 0 \end{pmatrix} \begin{pmatrix} 1 & 1 & 0 & 0 \\ 1 & 1 & 0 & 0 \\ 0 & 0 & 0 & 0 \\ 0 & 0 & 0 & 0 \end{pmatrix} = T_{CP} \begin{pmatrix} 1 & 1 & 0 & 0 \\ 0 & 0 & 0 & 0 \\ 0 & 0 & 0 & 0 \\ z & z & 0 & 0 \end{pmatrix} \quad (\text{S.10.18.5})$$

$$= T_{CP} \begin{pmatrix} 1 & 0 & 0 & 0 \\ 0 & 0 & 0 & -z \\ 0 & 0 & 1 & 0 \\ 0 & z & 0 & 0 \end{pmatrix} \left| \begin{array}{c} 1 \\ 1 \\ 0 \\ 0 \end{array} \right\rangle \left| \begin{array}{c} 1 \\ 1 \\ 0 \\ 0 \end{array} \right\rangle = T_{CP} \left| \begin{array}{c} 1 \\ 0 \\ 0 \\ z \end{array} \right\rangle \left| \begin{array}{c} 1 \\ 1 \\ 0 \\ 0 \end{array} \right\rangle$$

with  $z = \pm 1$

2 Rotated, ideal circular polariser as  $\pm 45^\circ$  calibrator

$D_p = 1, \omega = 0 \Rightarrow$

$$\mathbf{M}_{CP}(z, x45^\circ + \varepsilon) = \frac{\mathbf{R}(x45^\circ + \varepsilon)\mathbf{M}_{QW}(z45^\circ)\mathbf{M}_P(0^\circ)\mathbf{R}(-x45^\circ - \varepsilon)}{T_{CP}} =$$

$$3 \quad = \frac{\begin{pmatrix} 1 & 0 & 0 & 0 \\ 0 & -xS_{2\varepsilon} & -xC_{2\varepsilon} & 0 \\ 0 & xC_{2\varepsilon} & -xS_{2\varepsilon} & 0 \\ 0 & 0 & 0 & 1 \end{pmatrix} \begin{pmatrix} 1 & 0 & 0 & 0 \\ 0 & 0 & 0 & -z \\ 0 & 0 & 1 & 0 \\ 0 & z & 0 & 0 \end{pmatrix} \left| \begin{array}{c} 1 \\ 1 \\ 0 \\ 0 \end{array} \right\rangle \left| \begin{array}{c} 1 \\ 1 \\ 0 \\ 0 \end{array} \right\rangle \begin{pmatrix} 1 & 0 & 0 & 0 \\ 0 & -xS_{2\varepsilon} & xC_{2\varepsilon} & 0 \\ 0 & -xC_{2\varepsilon} & -xS_{2\varepsilon} & 0 \\ 0 & 0 & 0 & 1 \end{pmatrix}}{T_{CP}} = \quad (\text{S.10.18.6})$$

$$= \begin{pmatrix} 1 & -xS_{2\varepsilon} & xC_{2\varepsilon} & 0 \\ 0 & 0 & 0 & 0 \\ 0 & 0 & 0 & 0 \\ z & -zXS_{2\varepsilon} & zXC_{2\varepsilon} & 0 \end{pmatrix} \left| \begin{array}{c} 1 \\ 0 \\ 0 \\ z \end{array} \right\rangle \left| \begin{array}{c} 1 \\ -xS_{2\varepsilon} \\ xC_{2\varepsilon} \\ 0 \end{array} \right\rangle$$

1 Rotated circular polariser as  $+45^\circ$  calibrator with a QWP, with retardation error

2 From Eq. (S.10.9.3)

$$\begin{aligned}
 & \frac{\mathbf{M}_{QW}(\phi)\mathbf{M}_P}{T_{QW}T_O} = \\
 & 3 = \left( \begin{array}{ccc}
 1 + c_{2\phi}D_{QW}D_P & c_{2\phi}D_{QW} + D_P & \dots \\
 c_{2\phi}D_{QW} + (1 - s_{2\phi}^2W_{QW})D_P & c_{2\phi}D_{QW}D_P + (1 - s_{2\phi}^2W_{QW}) & \dots \\
 s_{2\phi}(D_{QW} + c_{2\phi}W_{QW}D_P) & s_{2\phi}(D_{QW}D_P + c_{2\phi}W_{QW}) & \dots \\
 s_{2\phi}Z_{QW}S_{QW}D_P & s_{2\phi}Z_{QW}S_{QW} & \dots \\
 \dots & s_{2\phi}D_{QW}Z_Pc_P & s_{2\phi}D_{QW}Z_Ps_P \\
 \dots & s_{2\phi}(c_{2\phi}W_{QW}c_P + Z_{QW}S_{QW}S_P)Z_P & s_{2\phi}(c_{2\phi}W_{QW}S_P - Z_{QW}S_{QW}c_P)Z_P \\
 \dots & [(1 - c_{2\phi}^2W_{QW})c_P - c_{2\phi}Z_{QW}S_{QW}S_P]Z_P & [(1 - c_{2\phi}^2W_{QW})S_P + c_{2\phi}Z_{QW}S_{QW}c_P]Z_P \\
 \dots & -(c_{2\phi}S_{QW}c_P + c_{QW}S_P)Z_{QW}Z_P & (-c_{2\phi}S_{QW}S_P + c_{QW}c_P)Z_{QW}Z_P
 \end{array} \right) \quad (S.10.18.7)
 \end{aligned}$$

$$\begin{aligned}
 & 4 \quad \mathbf{M}_{QW}(\phi)\mathbf{M}_P = T_{QW} \left( \begin{array}{cccc}
 1 & 0 & 0 & 0 \\
 0 & c_{2\phi}^2 & s_{2\phi}c_{2\phi} & -s_{2\phi} \\
 0 & s_{2\phi}c_{2\phi} & s_{2\phi}^2 & c_{2\phi} \\
 0 & s_{2\phi} & -c_{2\phi} & 0
 \end{array} \right) \left| \begin{array}{c} 1 \\ 1 \\ 0 \\ 0 \end{array} \right\rangle \left\langle \begin{array}{c} 1 \\ 1 \\ 0 \\ 0 \end{array} \right| = T_{QW} \left( \begin{array}{cccc}
 1 & & & \\
 & c_{2\phi}^2 & & \\
 & s_{2\phi}c_{2\phi} & & \\
 & s_{2\phi} & & 
 \end{array} \right) \left| \begin{array}{c} 1 \\ 1 \\ 0 \\ 0 \end{array} \right\rangle \left\langle \begin{array}{c} 1 \\ 1 \\ 0 \\ 0 \end{array} \right| \quad (S.10.18.8)
 \end{aligned}$$

$$\phi = x45^\circ + \varepsilon \Rightarrow c_{2\phi} \rightarrow -xs_{2\varepsilon}, s_{2\phi} \rightarrow xc_{2\varepsilon} \Rightarrow$$

$$\begin{aligned}
 & \frac{\mathbf{M}_{QW}(x45^\circ + \varepsilon)\mathbf{M}_P}{T_{QW}T_P} = \\
 & 5 = \left( \begin{array}{ccc}
 1 - xs_{2\varepsilon}D_{QW}D_P & -xs_{2\varepsilon}D_{QW} + D_P & \dots \\
 -xs_{2\varepsilon}D_{QW} + (1 - c_{2\varepsilon}^2W_{QW})D_P & -xs_{2\varepsilon}D_{QW}D_P + (1 - c_{2\varepsilon}^2W_{QW}) & \dots \\
 c_{2\varepsilon}(xD_{QW} - s_{2\varepsilon}W_{QW}D_P) & c_{2\varepsilon}(xD_{QW}D_P - s_{2\varepsilon}W_{QW}) & \dots \\
 xc_{2\varepsilon}Z_{QW}S_{QW}D_P & xc_{2\varepsilon}Z_{QW}S_{QW} & \dots \\
 \dots & xc_{2\varepsilon}D_{QW}Z_Pc_P & xc_{2\varepsilon}D_{QW}Z_Ps_P \\
 \dots & -c_{2\varepsilon}(s_{2\varepsilon}W_{QW}c_P - xZ_{QW}S_{QW}S_P)Z_P & -c_{2\varepsilon}(s_{2\varepsilon}W_{QW}S_P + xZ_{QW}S_{QW}c_P)Z_P \\
 \dots & [(1 - s_{2\varepsilon}^2W_{QW})c_P + xs_{2\varepsilon}Z_{QW}S_{QW}S_P]Z_P & [(1 - s_{2\varepsilon}^2W_{QW})S_P - xs_{2\varepsilon}Z_{QW}S_{QW}c_P]Z_P \\
 \dots & -(-xs_{2\varepsilon}S_{QW}c_P + c_{QW}S_P)Z_{QW}Z_P & (+xs_{2\varepsilon}S_{QW}S_P + c_{QW}c_P)Z_{QW}Z_P
 \end{array} \right) \quad (S.10.18.9)
 \end{aligned}$$

$$\phi = 45^\circ + \varepsilon \Rightarrow c_{2\phi} \rightarrow -s_{2\varepsilon}, s_{2\phi} \rightarrow c_{2\varepsilon} \Rightarrow$$

$$\frac{\mathbf{M}_{QW}(45^\circ + \varepsilon)\mathbf{M}_P}{T_{QW}T_P} =$$

$$= \begin{pmatrix} 1 - s_{2\varepsilon}D_{QW}D_P & -s_{2\varepsilon}D_{QW} + D_P & \dots \\ -s_{2\varepsilon}D_{QW} + (1 - c_{2\varepsilon}^2W_{QW})D_P & -s_{2\varepsilon}D_{QW}D_P + (1 - c_{2\varepsilon}^2W_{QW}) & \dots \\ c_{2\varepsilon}(D_{QW} - s_{2\varepsilon}W_{QW}D_P) & c_{2\varepsilon}(D_{QW}D_P - s_{2\varepsilon}W_{QW}) & \dots \\ c_{2\varepsilon}Z_{QW}s_{QW}D_P & c_{2\varepsilon}Z_{QW}s_{QW} & \dots \\ \dots & c_{2\varepsilon}D_{QW}Z_Pc_P & c_{2\varepsilon}D_{QW}Z_Ps_P \\ \dots & -c_{2\varepsilon}(s_{2\varepsilon}W_{QW}c_P - Z_{QW}s_{QW}s_P)Z_P & -c_{2\varepsilon}(s_{2\varepsilon}W_{QW}s_P + Z_{QW}s_{QW}c_P)Z_P \\ \dots & [(1 - s_{2\varepsilon}^2W_{QW})c_P + s_{2\varepsilon}Z_{QW}s_{QW}s_P]Z_P & [(1 - s_{2\varepsilon}^2W_{QW})s_P - s_{2\varepsilon}Z_{QW}s_{QW}c_P]Z_P \\ \dots & (s_{2\varepsilon}s_{QW}c_P - c_{QW}s_P)Z_{QW}Z_P & (s_{2\varepsilon}s_{QW}s_P + c_{QW}c_P)Z_{QW}Z_P \end{pmatrix}$$

1

(S.10.18.10)

$$D_Q = 0, c_{QW} = 0, s_{QW} = 1, Z_{QW} = 1, W_{QW} = (1 - c_{QW}) = 1 \Rightarrow$$

$$\frac{[\mathbf{M}_{QW}(45^\circ + \varepsilon)\mathbf{M}_P](x45^\circ)}{T_{QW}T_P} =$$

$$= \begin{pmatrix} 1 & D_P & \dots \\ s_{2\varepsilon}^2D_P & s_{2\varepsilon}^2 & \dots \\ -c_{2\varepsilon}s_{2\varepsilon}D_P & -c_{2\varepsilon}s_{2\varepsilon}D_P & \dots \\ c_{2\varepsilon}D_P & c_{2\varepsilon} & \dots \\ \dots & 0 & 0 \\ \dots & -c_{2\varepsilon}(s_{2\varepsilon}c_P - s_P)Z_P & -c_{2\varepsilon}(s_{2\varepsilon}s_P + c_P)Z_P \\ \dots & (c_{2\varepsilon}^2c_P + s_{2\varepsilon}s_P)Z_P & (c_{2\varepsilon}^2s_P - s_{2\varepsilon}c_P)Z_P \\ \dots & s_{2\varepsilon}c_PZ_P & s_{2\varepsilon}s_PZ_P \end{pmatrix} \begin{pmatrix} 1 & 0 & 0 & 0 \\ 0 & 0 & -x & 0 \\ 0 & x & 0 & 0 \\ 0 & 0 & 0 & 1 \end{pmatrix} =$$

$$= \begin{pmatrix} 1 & 0 & -xD_P & 0 \\ s_{2\varepsilon}^2D_P & (c_{2\varepsilon}^2c_P + s_{2\varepsilon}s_P)Z_P & c_{2\varepsilon}s_{2\varepsilon}D_P & x(c_{2\varepsilon}^2s_P - s_{2\varepsilon}c_P)Z_P \\ -c_{2\varepsilon}s_{2\varepsilon}D_P & c_{2\varepsilon}(s_{2\varepsilon}c_P - s_P)Z_P & s_{2\varepsilon}^2 & -xc_{2\varepsilon}(s_{2\varepsilon}s_P + c_P)Z_P \\ c_{2\varepsilon}D_P & xs_{2\varepsilon}c_PZ_P & -xc_{2\varepsilon} & s_{2\varepsilon}s_PZ_P \end{pmatrix}$$

2

(S.10.18.11)

$$\left. \begin{aligned} \phi = 45^\circ + \varepsilon \Rightarrow c_{2\phi} \rightarrow -s_{2\varepsilon}, s_{2\phi} \rightarrow c_{2\varepsilon}, \Delta_{QW} = 90^\circ + \zeta \Rightarrow c_{QW} = -s_\zeta \rightarrow 0, s_{QW} = c_\zeta \rightarrow 1 \\ (1 - c_{2\varepsilon}^2 W_{QW}) = (1 - c_{2\varepsilon}^2 (1 - Z_{QW} c_{QW})) = s_{2\varepsilon}^2 + c_{2\varepsilon}^2 Z_{QW} c_{QW} = (s_{2\varepsilon}^2 - c_{2\varepsilon}^2 Z_{QW} s_\zeta), \\ (1 - s_{2\varepsilon}^2 W_{QW}) = c_{2\varepsilon}^2 + s_{2\varepsilon}^2 Z_{QW} c_{QW} = (c_{2\varepsilon}^2 - s_{2\varepsilon}^2 Z_{QW} s_\zeta) \end{aligned} \right\} \Rightarrow$$

$$\begin{aligned} & \left[ \mathbf{M}_{QW}(45^\circ + \varepsilon, \Delta_{QW} = 90^\circ + \zeta) \mathbf{M}_P \right] = \\ & \frac{T_{QW} T_P}{T_{QW} T_P} = \\ & = \begin{pmatrix} 1 - s_{2\varepsilon} D_{QW} D_P & -s_{2\varepsilon} D_{QW} + D_P & \dots & \dots \\ -s_{2\varepsilon} D_{QW} + (s_{2\varepsilon}^2 - c_{2\varepsilon}^2 Z_{QW} s_\zeta) D_P & -s_{2\varepsilon} D_{QW} D_P + (s_{2\varepsilon}^2 - c_{2\varepsilon}^2 Z_{QW} s_\zeta) & \dots & \dots \\ c_{2\varepsilon} (D_{QW} - s_{2\varepsilon} (1 - Z_{QW} c_{QW}) D_P) & c_{2\varepsilon} (D_{QW} D_P - s_{2\varepsilon} (1 - Z_{QW} c_{QW})) & \dots & \dots \\ c_{2\varepsilon} Z_{QW} c_\zeta D_P & c_{2\varepsilon} Z_{QW} c_\zeta & \dots & \dots \\ \dots & c_{2\varepsilon} D_{QW} Z_P c_P & \dots & c_{2\varepsilon} D_{QW} Z_P s_P \\ \dots & -c_{2\varepsilon} (s_{2\varepsilon} (1 - Z_{QW} c_{QW}) c_P - Z_{QW} c_\zeta s_P) Z_P & \dots & -c_{2\varepsilon} (s_{2\varepsilon} (1 - Z_{QW} c_{QW}) s_P + Z_{QW} c_\zeta c_P) Z_P \\ \dots & [(c_{2\varepsilon}^2 - s_{2\varepsilon}^2 Z_{QW} s_\zeta) c_P + s_{2\varepsilon} Z_{QW} c_\zeta s_P] Z_P & \dots & [(c_{2\varepsilon}^2 - s_{2\varepsilon}^2 Z_{QW} s_\zeta) s_P - s_{2\varepsilon} Z_{QW} c_\zeta c_P] Z_P \\ \dots & (s_{2\varepsilon} c_\zeta c_P + s_\zeta s_P) Z_{QW} Z_P & \dots & (s_{2\varepsilon} c_\zeta s_P - s_\zeta c_P) Z_{QW} Z_P \end{pmatrix} \end{aligned}$$

1 (S.10.18.12)

$$\phi = 45^\circ \Rightarrow c_{2\phi} = 0, s_{2\phi} = 1 \Rightarrow$$

$$2 \frac{\mathbf{M}_{QW}(45^\circ) \mathbf{M}_P}{T_{QW} T_P} = \begin{pmatrix} 1 & D_P & c_P D_{QW} Z_P & s_P D_{QW} Z_P \\ c_{QW} Z_{QW} D_P & c_{QW} Z_{QW} & s_{QW} s_P Z_{QW} Z_P & -s_{QW} c_P Z_{QW} Z_P \\ D_{QW} & D_{QW} D_P & c_P Z_P & s_P Z_P \\ s_{QW} Z_{QW} D_P & Z_{QW} s_{QW} & -c_{QW} s_P Z_{QW} Z_P & c_{QW} c_P Z_{QW} Z_P \end{pmatrix} \quad (\text{S.10.18.13})$$

$$D_{QW} = 0, Z_{QW} = 1, W_{QW} = (1 - c_{QW}), \phi = 45^\circ + \varepsilon \Rightarrow c_{2\phi} \rightarrow -s_{2\varepsilon}, s_{2\phi} \rightarrow c_{2\varepsilon} \Rightarrow$$

$$3 \frac{\mathbf{M}_{CP}(0^\circ)}{T_{CP}} = \frac{\mathbf{M}_{QW}(45^\circ) \mathbf{M}_P}{T_{QW} T_P} = \begin{pmatrix} 1 & D_P & 0 & 0 \\ c_{QW} D_P & c_{QW} & s_{QW} s_P Z_P & -s_{QW} c_P Z_P \\ 0 & 0 & c_P Z_P & s_P Z_P \\ s_{QW} D_P & s_{QW} & -c_{QW} s_P Z_P & c_{QW} c_P Z_P \end{pmatrix} \quad (\text{S.10.18.14})$$

$$\phi = 45^\circ + \varepsilon \Rightarrow c_{2\phi} \rightarrow -s_{2\varepsilon}, s_{2\phi} \rightarrow c_{2\varepsilon}, \Delta_{QW} = 90^\circ + \zeta \Rightarrow c_{QW} = -s_\zeta, s_{QW} = c_\zeta \Rightarrow$$

$$\left[ \frac{\mathbf{M}_{QW}(45^\circ, \Delta_{QW} = 90^\circ + \zeta) \mathbf{M}_P}{T_{QW} T_P} \right] = \begin{pmatrix} 1 & D_P & c_P D_{QW} Z_P & s_P D_{QW} Z_P \\ -s_\zeta Z_{QW} D_P & -s_\zeta Z_{QW} & c_\zeta s_P Z_{QW} Z_P & -c_\zeta c_P Z_{QW} Z_P \\ D_{QW} & D_{QW} D_P & c_P Z_P & s_P Z_P \\ c_\zeta Z_{QW} D_P & c_\zeta Z_{QW} & s_\zeta s_P Z_{QW} Z_P & -s_\zeta c_P Z_{QW} Z_P \end{pmatrix}$$

4 (S.10.18.15)

$$\begin{aligned}
& \frac{[\mathbf{M}_{QW}(45^\circ, \Delta_Q=90^\circ + \zeta)\mathbf{M}_P](x45^\circ + \varepsilon)}{T_{QW}T_P} = \\
& = \begin{pmatrix} 1 & 0 & 0 & 0 \\ 0 & -xS_{2\varepsilon} & -x\mathbf{c}_{2\varepsilon} & 0 \\ 0 & x\mathbf{c}_{2\varepsilon} & -xS_{2\varepsilon} & 0 \\ 0 & 0 & 0 & 1 \end{pmatrix} \begin{pmatrix} 1 & D_P & \mathbf{c}_P D_{QW} Z_P & \mathbf{s}_P D_{QW} Z_P \\ -s_\zeta Z_{QW} D_P & -s_\zeta Z_Q & \mathbf{c}_\zeta \mathbf{s}_P Z_{QW} Z_P & -\mathbf{c}_\zeta \mathbf{c}_P Z_{QW} Z_P \\ D_{QW} & D_{QW} D_P & \mathbf{c}_P Z_P & \mathbf{s}_P Z_P \\ \mathbf{c}_\zeta Z_{QW} D_P & \mathbf{c}_\zeta Z_Q & \mathbf{s}_\zeta \mathbf{s}_P Z_{QW} Z_P & -\mathbf{s}_\zeta \mathbf{c}_P Z_{QW} Z_P \end{pmatrix} \begin{pmatrix} 1 & 0 & 0 & 0 \\ 0 & -xS_{2\varepsilon} & x\mathbf{c}_{2\varepsilon} & 0 \\ 0 & -x\mathbf{c}_{2\varepsilon} & -xS_{2\varepsilon} & 0 \\ 0 & 0 & 0 & 1 \end{pmatrix} = \\
& = \begin{pmatrix} 1 & -x(\mathbf{s}_{2\varepsilon} D_P + \mathbf{c}_{2\varepsilon} \mathbf{c}_P D_Q Z_P) & \dots & \dots \\ x(\mathbf{s}_{2\varepsilon} \mathbf{s}_\zeta Z_{QW} D_P - \mathbf{c}_{2\varepsilon} D_{QW}) & -\mathbf{s}_{2\varepsilon}^2 \mathbf{s}_\zeta Z_{QW} + \mathbf{c}_{2\varepsilon}^2 \mathbf{c}_P Z_P + \mathbf{c}_{2\varepsilon} \mathbf{s}_{2\varepsilon} (\mathbf{c}_\zeta \mathbf{s}_P Z_P Z_{QW} + D_{QW} D_P) & \dots & \dots \\ -x(\mathbf{c}_{2\varepsilon} \mathbf{s}_\zeta Z_{QW} D_P + \mathbf{s}_{2\varepsilon} D_{QW}) & \mathbf{c}_{2\varepsilon} \mathbf{s}_{2\varepsilon} (\mathbf{s}_\zeta Z_{QW} + \mathbf{c}_P Z_P) - \mathbf{c}_{2\varepsilon}^2 \mathbf{c}_\zeta \mathbf{s}_P Z_P Z_{QW} + \mathbf{s}_{2\varepsilon}^2 D_{QW} D_P & \dots & \dots \\ \mathbf{c}_\zeta Z_{QW} D_P & -x(\mathbf{s}_{2\varepsilon} \mathbf{c}_\zeta + \mathbf{c}_{2\varepsilon} \mathbf{s}_\zeta \mathbf{s}_P Z_P) Z_{QW} & \dots & \dots \\ \dots & x(\mathbf{c}_{2\varepsilon} D_P - \mathbf{s}_{2\varepsilon} \mathbf{c}_P D_{QW} Z_P) & \mathbf{s}_P D_{QW} Z_P & \dots \\ \dots & \mathbf{c}_{2\varepsilon} \mathbf{s}_{2\varepsilon} (\mathbf{s}_\zeta Z_{QW} + \mathbf{c}_P Z_P) + \mathbf{s}_{2\varepsilon}^2 \mathbf{c}_\zeta \mathbf{s}_P Z_P Z_{QW} - \mathbf{c}_{2\varepsilon}^2 D_{QW} D_P & x(\mathbf{s}_{2\varepsilon} \mathbf{c}_\zeta \mathbf{c}_P Z_{QW} - \mathbf{c}_{2\varepsilon} \mathbf{s}_P) Z_P & \dots \\ \dots & -\mathbf{c}_{2\varepsilon}^2 \mathbf{s}_\zeta Z_{QW} + \mathbf{s}_{2\varepsilon}^2 \mathbf{c}_P Z_P - \mathbf{c}_{2\varepsilon} \mathbf{s}_{2\varepsilon} (\mathbf{c}_\zeta \mathbf{s}_P Z_P Z_{QW} + D_{QW} D_P) & -x(\mathbf{c}_{2\varepsilon} \mathbf{c}_\zeta \mathbf{c}_P Z_{QW} + \mathbf{s}_{2\varepsilon} \mathbf{s}_P) Z_P & \dots \\ \dots & x(\mathbf{c}_{2\varepsilon} \mathbf{c}_\zeta - \mathbf{s}_{2\varepsilon} \mathbf{s}_\zeta \mathbf{s}_P Z_P) Z_{QW} & -\mathbf{s}_\zeta \mathbf{c}_P Z_{QW} Z_P & \dots \end{pmatrix} \\
& 1 \tag{S.10.18.16}
\end{aligned}$$

CP with ideal LP:  $D_P = 1, Z_P = 0, \Rightarrow$

$$\begin{aligned}
& \frac{[\mathbf{M}_{QW}(45^\circ, \Delta_{QW}=90^\circ + \zeta)\mathbf{M}_P](x45^\circ + \varepsilon)}{T_{QW}T_P} = \\
& = \begin{pmatrix} 1 & -xS_{2\varepsilon} & x\mathbf{c}_{2\varepsilon} & 0 \\ x(\mathbf{s}_{2\varepsilon} \mathbf{s}_\zeta Z_{QW} - \mathbf{c}_{2\varepsilon} D_{QW}) & -\mathbf{s}_{2\varepsilon}^2 \mathbf{s}_\zeta Z_{QW} + \mathbf{c}_{2\varepsilon} \mathbf{s}_{2\varepsilon} D_{QW} & \mathbf{c}_{2\varepsilon} \mathbf{s}_{2\varepsilon} \mathbf{s}_\zeta Z_{QW} - \mathbf{c}_{2\varepsilon}^2 D_{QW} & 0 \\ -x(\mathbf{c}_{2\varepsilon} \mathbf{s}_\zeta Z_{QW} + \mathbf{s}_{2\varepsilon} D_{QW}) & \mathbf{c}_{2\varepsilon} \mathbf{s}_{2\varepsilon} \mathbf{s}_\zeta Z_{QW} + \mathbf{s}_{2\varepsilon}^2 D_{QW} & -\mathbf{c}_{2\varepsilon}^2 \mathbf{s}_\zeta Z_{QW} - \mathbf{c}_{2\varepsilon} \mathbf{s}_{2\varepsilon} D_{QW} & 0 \\ \mathbf{c}_\zeta Z_{QW} & -x\mathbf{s}_{2\varepsilon} \mathbf{c}_\zeta Z_{QW} & x\mathbf{c}_{2\varepsilon} \mathbf{c}_\zeta Z_{QW} & 0 \end{pmatrix} = \\
& = \begin{pmatrix} 1 & -xS_{2\varepsilon} & x\mathbf{c}_{2\varepsilon} & 0 \\ x(\mathbf{s}_{2\varepsilon} \mathbf{s}_\zeta Z_{QW} - \mathbf{c}_{2\varepsilon} D_{QW}) & -xS_{2\varepsilon} & x\mathbf{c}_{2\varepsilon} & 0 \\ -x(\mathbf{c}_{2\varepsilon} \mathbf{s}_\zeta Z_{QW} + \mathbf{s}_{2\varepsilon} D_{QW}) & -xS_{2\varepsilon} & x\mathbf{c}_{2\varepsilon} & 0 \\ \mathbf{c}_\zeta Z_{QW} & -xS_{2\varepsilon} & x\mathbf{c}_{2\varepsilon} & 0 \end{pmatrix} \\
& 2 \tag{S.10.18.17}
\end{aligned}$$

$$\frac{\langle \mathbf{A}_S(y) | \mathbf{M}_{CP}(x45^\circ + \varepsilon, \omega) \rangle}{T_S T_{CP}} = \frac{\langle \mathbf{M}_S \mathbf{R}_y | \mathbf{M}_{CP}(x45^\circ + \varepsilon, \omega) \rangle}{T_S T_{CP}} =$$

$$= \left\langle \begin{array}{c} 1 \\ yD_S \\ 0 \\ 0 \end{array} \left\| \begin{array}{c} 1 \\ x(s_{2\varepsilon}s_\omega Z_{QW} - c_{2\varepsilon}D_{QW}) \\ -x(c_{2\varepsilon}s_\omega Z_{QW} + s_{2\varepsilon}D_{QW}) \\ c_\omega Z_{QW} \end{array} \right. \right\rangle \left\langle \begin{array}{c} 1 \\ -xs_{2\varepsilon} \\ xc_{2\varepsilon} \\ 0 \end{array} \right| = [1 + xyD_S(s_{2\varepsilon}s_\omega Z_{QW} - c_{2\varepsilon}D_{QW})] \left\langle \begin{array}{c} 1 \\ -xs_{2\varepsilon} \\ xc_{2\varepsilon} \\ 0 \end{array} \right|$$

1 (S.10.18.18)

$$2 \frac{I_S}{\eta_S T_S T_{CP} T_O F_{11} T_E I_L} = [1 + xyD_S(s_{2\varepsilon}s_\omega Z_{QW} - c_{2\varepsilon}D_{QW})] \left\langle \begin{array}{c} 1 \\ -xs_{2\varepsilon} \\ xc_{2\varepsilon} \\ 0 \end{array} \left\| \begin{array}{c} i_{in} \\ q_{in} \\ u_{in} \\ v_{in} \end{array} \right. \right\rangle =$$

$$= [1 + xyD_S(s_{2\varepsilon}s_\omega Z_{QW} - c_{2\varepsilon}D_{QW})] [i_{in} - x(s_{2\varepsilon}q_{in} - c_{2\varepsilon}u_{in})]$$

(S.10.18.19)

$$D_T = +1, D_R = -1 \Rightarrow$$

$$3 \frac{\eta^*}{\eta} = \frac{1 - xy(s_{2\varepsilon}s_\omega Z_{QW} - c_{2\varepsilon}D_{QW})}{1 + xy(s_{2\varepsilon}s_\omega Z_{QW} - c_{2\varepsilon}D_{QW})}$$

(S.10.18.20)

$$D_Q = 0, Z_Q = 1 \Rightarrow$$

$$\frac{\langle \mathbf{A}_S(y) | \mathbf{M}_{CP}(x45^\circ + \varepsilon, \omega) \rangle}{T_S T_{CP}} = \frac{\langle \mathbf{M}_S \mathbf{R}_y | \mathbf{M}_{CP}(x45^\circ + \varepsilon, \omega) \rangle}{T_S T_{CP}} =$$

$$4 = \left\langle \begin{array}{c} 1 \\ yD_S \\ 0 \\ 0 \end{array} \left\| \begin{array}{c} 1 \\ xs_{2\varepsilon}s_\omega \\ -xc_{2\varepsilon}s_\omega \\ c_\omega \end{array} \right. \right\rangle \left\langle \begin{array}{c} 1 \\ -xs_{2\varepsilon} \\ xc_{2\varepsilon} \\ 0 \end{array} \right| = [1 + xyD_S s_{2\varepsilon} s_\omega] \left\langle \begin{array}{c} 1 \\ -xs_{2\varepsilon} \\ xc_{2\varepsilon} \\ 0 \end{array} \right|$$

(S.10.18.21)

$$\frac{\langle \mathbf{A}_S(y, \gamma) | \mathbf{M}_{CP}(x45^\circ + \varepsilon) \rangle}{T_S T_O T_{CP}} = \frac{\langle \mathbf{M}_S \mathbf{R}_y \mathbf{M}_O(\gamma) | \mathbf{M}_{CP}(x45^\circ + \varepsilon) \rangle}{T_S T_O T_{CP}} =$$

$$5 = \left\langle \begin{array}{c} 1 + yc_{2\gamma} D_S D_O \\ c_{2\gamma} D_O + yD_S (1 - s_{2\gamma}^2 W_O) \\ s_{2\gamma} (D_O + yc_{2\gamma} D_S W_O) \\ -ys_{2\gamma} D_S Z_O S_O \end{array} \left\| \begin{array}{c} 1 \\ x(s_{2\varepsilon}s_\gamma Z_{QW} - c_{2\varepsilon}D_{QW}) \\ -x(c_{2\varepsilon}s_\gamma Z_{QW} + s_{2\varepsilon}D_{QW}) \\ c_\gamma Z_{QW} \end{array} \right. \right\rangle \left\langle \begin{array}{c} 1 \\ -xs_{2\varepsilon} \\ xc_{2\varepsilon} \\ 0 \end{array} \right| =$$

(S.10.18.22)

$$= 1 + yD_S (c_{2\gamma} D_O - s_{2\gamma} Z_O S_O c_\gamma Z_{QW}) +$$

$$+ x \left\{ \begin{array}{l} [c_{2\gamma} D_O + yD_S (1 - s_{2\gamma}^2 W_O)] (s_{2\varepsilon} s_\gamma Z_{QW} - c_{2\varepsilon} D_{QW}) - \\ -s_{2\gamma} (D_O + yc_{2\gamma} D_S W_O) (c_{2\varepsilon} s_\gamma Z_{QW} + s_{2\varepsilon} D_{QW}) \end{array} \right\}$$



$$\gamma = 0 \Rightarrow$$

$$1 \quad \frac{\langle \mathbf{A}_s(y,0) | \mathbf{M}_{CP}(x45^\circ + \varepsilon) \rangle}{T_S T_O T_{CP}} = \frac{\langle \mathbf{M}_s \mathbf{R}_y \mathbf{M}_O(0) | \mathbf{M}_{CP}(x45^\circ + \varepsilon) \rangle}{T_S T_O T_{CP}} = \quad (S.10.18.23)$$

$$= 1 + yD_S D_O + x \left\{ [D_O + yD_S] (s_{2\varepsilon} s_\zeta Z_{QW} - c_{2\varepsilon} D_{QW}) \right\}$$

CP with QWP without diattenuation:  $D_{QW} = 0$ ,  $Z_{QW} = 1$ ,  $\Rightarrow$

$$2 \quad \frac{[\mathbf{M}_{QW}(45^\circ, \Delta_{QW}=90^\circ + \zeta) \mathbf{M}_P](x45^\circ + \varepsilon)}{T_{QW} T_P} = \quad (S.10.18.24)$$

$$= \begin{pmatrix} 1 & -x s_{2\varepsilon} D_P & \cdot & \cdot \\ x s_{2\varepsilon} s_\zeta D_P & -s_{2\varepsilon}^2 s_\zeta + c_{2\varepsilon} (c_{2\varepsilon} c_P + s_{2\varepsilon} c_\zeta s_P) Z_P & \cdot & \cdot \\ -x c_{2\varepsilon} s_\zeta D_P & c_{2\varepsilon} s_{2\varepsilon} s_\zeta + c_{2\varepsilon} (s_{2\varepsilon} c_P - c_{2\varepsilon} c_\zeta s_P) Z_P & \cdot & \cdot \\ c_\zeta D_P & -x (s_{2\varepsilon} c_\zeta + c_{2\varepsilon} s_\zeta s_P Z_P) & \cdot & \cdot \\ \cdot & x c_{2\varepsilon} D_P & & 0 \\ \cdot & \cdot & c_{2\varepsilon} s_{2\varepsilon} s_\zeta + s_{2\varepsilon} (c_{2\varepsilon} c_P + s_{2\varepsilon} c_\zeta s_P) Z_P & x (s_{2\varepsilon} c_\zeta c_P - c_{2\varepsilon} s_P) Z_P \\ \cdot & \cdot & -c_{2\varepsilon}^2 s_\zeta + s_{2\varepsilon} (s_{2\varepsilon} c_P - c_{2\varepsilon} c_\zeta s_P) Z_P & -x (c_{2\varepsilon} c_\zeta c_P + s_{2\varepsilon} s_P) Z_P \\ \cdot & \cdot & x (c_{2\varepsilon} c_\zeta - s_{2\varepsilon} s_\zeta s_P Z_P) & -s_\zeta c_P Z_P \end{pmatrix}$$

CP with QW without diattenuation and phase shift error:  $D_{QW} = 0$ ,  $Z_{QW} = 1$ ,  $\zeta = 0 \Rightarrow$

$$3 \quad \frac{[\mathbf{M}_{QW}(45^\circ, \Delta_{QW}=90^\circ) \mathbf{M}_P](x45^\circ + \varepsilon)}{T_{QW} T_P} = \begin{pmatrix} 1 & -x s_{2\varepsilon} D_P & x c_{2\varepsilon} D_P & 0 \\ 0 & c_{2\varepsilon} c_{2\varepsilon-P} Z_P & s_{2\varepsilon} c_{2\varepsilon-P} Z_P & x s_{2\varepsilon-P} Z_P \\ 0 & c_{2\varepsilon} s_{2\varepsilon-P} Z_P & s_{2\varepsilon} s_{2\varepsilon-P} Z_P & -x c_{2\varepsilon-P} Z_P \\ D_P & -x s_{2\varepsilon} & x c_{2\varepsilon} & 0 \end{pmatrix} \quad (S.10.18.25)$$

#### 4 **S.10.19 Circular analyser (CA)**

5 (see Chipman (2009a) Chap. 15.26)

6 In order to keep the same flexibility regarding the mutual orientation between the linear  
7 polariser and the  $\lambda/4$  plate as for the circular polariser, we construct the ideal circular analyser  
8 with a  $\lambda/4$  plate at  $\pm 45^\circ$  and a linear polariser at  $0^\circ$  or  $90^\circ$  (according to Chipman (2009a)  
9 15.18: left circular analyser for  $x, z = +1$ ) from Eqs. (S.10.8.5) and (S.10.17.4)

$$\begin{aligned}
& \frac{\mathbf{M}_{CA}(x,z)}{T_{CA}} = \frac{\mathbf{M}_P(45^\circ - x45^\circ)}{T_P} \frac{\mathbf{M}_{QW}(z45^\circ)}{T_{QW}} = \\
1 \quad & = \left| \begin{array}{c|c} 1 & 1 \\ \hline x & x \\ 0 & 0 \\ 0 & 0 \end{array} \right| \begin{pmatrix} 1 & 0 & 0 & 0 \\ 0 & 0 & 0 & -z \\ 0 & 0 & 1 & 0 \\ 0 & z & 0 & 0 \end{pmatrix} = \left| \begin{array}{c|c} 1 & 1 \\ \hline x & 0 \\ 0 & 0 \\ 0 & -xz \end{array} \right| = \begin{pmatrix} 1 & 0 & 0 & -zx \\ x & 0 & 0 & -z \\ 0 & 0 & 0 & 0 \\ 0 & 0 & 0 & 0 \end{pmatrix} \quad (\text{S.10.19.1})
\end{aligned}$$

with  $x, z = \pm 1$

with  $zx = +1 \Rightarrow$  left circ. analyzer

with  $zx = -1 \Rightarrow$  right circ. analyzer

2 **Ideal** circular analyser with QWP at  $z45^\circ$  with error angle  $\varepsilon$

$$\begin{aligned}
& \frac{\mathbf{M}_{CA}(x,z,\varepsilon)}{T_{CA}} = \mathbf{R}(+\varepsilon) \frac{\mathbf{M}_{CA}(x,z)}{T_{CA}} \mathbf{R}(-\varepsilon) = \\
3 \quad & = \begin{pmatrix} 1 & 0 & 0 & 0 \\ 0 & c_{2\varepsilon} & -xs_{2\varepsilon} & 0 \\ 0 & xs_{2\varepsilon} & c_{2\varepsilon} & 0 \\ 0 & 0 & 0 & 1 \end{pmatrix} \begin{pmatrix} 1 & 0 & 0 & -zx \\ x & 0 & 0 & -z \\ 0 & 0 & 0 & 0 \\ 0 & 0 & 0 & 0 \end{pmatrix} \begin{pmatrix} 1 & 0 & 0 & 0 \\ 0 & c_{2\varepsilon} & xs_{2\varepsilon} & 0 \\ 0 & -xs_{2\varepsilon} & c_{2\varepsilon} & 0 \\ 0 & 0 & 0 & 1 \end{pmatrix} = \\
& = \begin{pmatrix} 1 & 0 & 0 & -zx \\ xc_{2\varepsilon} & 0 & 0 & -zc_{2\varepsilon} \\ s_{2\varepsilon} & 0 & 0 & -zxs_{2\varepsilon} \\ 0 & 0 & 0 & 1 \end{pmatrix} = \left| \begin{array}{c|c} 1 & 1 \\ \hline xc_{2\varepsilon} & 0 \\ s_{2\varepsilon} & 0 \\ 0 & -zx \end{array} \right| \quad (\text{S.10.19.2})
\end{aligned}$$

1 **S.11**            **Helpful relations**

2 (see also S.10.10)

$$3 \quad \frac{1-\delta}{1+\delta} = a = \frac{I_{\parallel} - I_{\perp}}{I_{\parallel} + I_{\perp}}, \quad \delta = \frac{1-a}{1+a} \quad (\text{S.11.1})$$

$$4 \quad D_T \equiv \frac{T_T^p - T_T^s}{T_T^p + T_T^s}, \quad T_T \equiv 0.5(T_T^p + T_T^s) \quad (\text{S.11.2})$$

$$5 \quad \left. \begin{aligned} 1 - D_T &= 1 - \frac{T_T^p - T_T^s}{T_T^p + T_T^s} = \frac{2T_T^s}{T_T^p + T_T^s} = \frac{T_T^s}{T_T} \\ 1 + D_T &= 1 - \frac{T_T^p - T_T^s}{T_T^p + T_T^s} = \frac{2T_T^p}{T_T^p + T_T^s} = \frac{T_T^p}{T_T} \end{aligned} \right\} \Rightarrow \frac{1+D_T}{1-D_T} = \frac{T_T^p}{T_T^s} \quad (\text{S.11.3})$$

$$6 \quad \begin{aligned} 1 + D_o D_T &= 1 + \frac{T_o^p - T_o^s}{T_o^p + T_o^s} \frac{T_T^p - T_T^s}{T_T^p + T_T^s} = \frac{(T_o^p + T_o^s)(T_T^p + T_T^s) + (T_o^p - T_o^s)(T_T^p - T_T^s)}{(T_o^p + T_o^s)(T_T^p + T_T^s)} = \\ &= \frac{T_o^p T_T^p + T_o^s T_T^s}{2T_o T_T} \end{aligned} \quad (\text{S.11.4})$$

$$6 \quad \begin{aligned} 1 - D_o D_T &= 1 - \frac{T_o^p - T_o^s}{T_o^p + T_o^s} \frac{T_T^p - T_T^s}{T_T^p + T_T^s} = \frac{(T_o^p + T_o^s)(T_T^p + T_T^s) - (T_o^p - T_o^s)(T_T^p - T_T^s)}{(T_o^p + T_o^s)(T_T^p + T_T^s)} = \\ &= \frac{T_o^s T_T^p + T_o^p T_T^s}{2T_o T_T} \end{aligned}$$

$$7 \quad D_o = 0 \Rightarrow Z_o = \sqrt{1 - D_o^2} = 1, \quad W_o = 1 - c_o \quad (\text{S.11.5})$$

$$8 \quad |D_o| = 1 \Rightarrow Z_o = \sqrt{1 - D_o^2} = 0, \quad W_o = 1 \quad (\text{S.11.6})$$

1 **S.12 Trigonometric relations**

$$2 \left. \begin{aligned} s_\phi c_\phi &= \frac{1}{2}s_{2\phi} \\ c_\alpha c_\beta &= \frac{1}{2}(c_{\alpha-\beta} + c_{\alpha+\beta}) \\ s_\alpha s_\beta &= \frac{1}{2}(c_{\alpha-\beta} - c_{\alpha+\beta}) \end{aligned} \right\} \Rightarrow \begin{cases} c_\phi c_\beta + s_\phi s_\beta = \frac{1}{2}(c_{\phi-\beta} + c_{\phi+\beta} + c_{\phi-\beta} - c_{\phi+\beta}) = c_{\phi-\beta} \\ c_\phi c_\beta - s_\phi s_\beta = \frac{1}{2}(c_{\phi-\beta} + c_{\phi+\beta} - c_{\phi-\beta} + c_{\phi+\beta}) = c_{\phi+\beta} \\ s_\phi c_\beta - c_\phi s_\beta = \frac{1}{2}(s_{\phi-\beta} + s_{\phi+\beta} - s_{\phi+\beta} + s_{\phi-\beta}) = s_{\phi-\beta} \\ s_\phi c_\beta + c_\phi s_\beta = \frac{1}{2}(s_{\phi-\beta} + s_{\phi+\beta} + s_{\phi+\beta} - s_{\phi-\beta}) = s_{\phi+\beta} \end{cases} \quad (\text{S.12.1})$$

with  $\phi = x45^\circ + \varepsilon, x = \pm 1 \Rightarrow$

$$c_{2\phi} = \cos[2(x45^\circ + \varepsilon)] = \cos(\pm 90^\circ + 2\varepsilon) = \mp \sin(2\varepsilon) = -xs_{2\varepsilon}$$

$$s_{2\phi} = \sin[2(x45^\circ + \varepsilon)] = \sin(\pm 90^\circ + 2\varepsilon) = \pm \cos(2\varepsilon) = xc_{2\varepsilon}$$

with  $\phi = x45^\circ + 45 + \varepsilon, x = \pm 1 \Rightarrow$

$$3 \quad c_{2\phi} = \cos[2(x45^\circ + 45 + \varepsilon)] = \cos(\pm 90^\circ + 90^\circ + 2\varepsilon) = \mp \cos(2\varepsilon) = -xc_{2\varepsilon} \quad (\text{S.12.2})$$

$$s_{2\phi} = \sin[2(x45^\circ + 45 + \varepsilon)] = \sin(\pm 90^\circ + 90^\circ + 2\varepsilon) = \mp \sin(2\varepsilon) = -xs_{2\varepsilon}$$

$$\text{for } (x45^\circ + \varepsilon) \rightarrow (x45^\circ + 45 + \varepsilon) \Rightarrow \begin{cases} -xs_{2\varepsilon} \rightarrow -xc_{2\varepsilon} \\ xc_{2\varepsilon} \rightarrow -xs_{2\varepsilon} \end{cases}$$

with  $x = \pm 1 \Rightarrow$

$$\cos[2(x45^\circ)] = 0$$

$$\sin[2(x45^\circ)] = x$$

$$\cos[2(x45^\circ + 45)] = -x$$

$$4 \quad \sin[2(x45^\circ + 45)] = 0 \quad (\text{S.12.3})$$

$$\cos[2(-x45^\circ - \gamma)] = \cos(\mp 90^\circ - 2\gamma) = \mp \sin(2\gamma) = -xs_{2\gamma}$$

$$\sin[2(-x45^\circ - \gamma)] = \sin(\mp 90^\circ - 2\gamma) = \mp \cos(2\gamma) = -xc_{2\gamma}$$

$$\cos\{2[x(45^\circ + \gamma)]\} = \cos[\pm(90^\circ + 2\gamma)] = -\sin(2\gamma) = -s_{2\gamma}$$

$$\sin\{2[x(45^\circ + \gamma)]\} = \sin[\pm(90^\circ + 2\gamma)] = \pm \cos(2\gamma) = xc_{2\gamma}$$

$\phi = x22.5^\circ + \varepsilon/2, x = \pm 1 \Rightarrow$

$$5 \quad c_{4\phi} = \cos[4(x22.5^\circ + \varepsilon/2)] = \cos(x90^\circ + 2\varepsilon) = -xs_{2\varepsilon} \quad (\text{S.12.4})$$

$$s_{4\phi} = \sin[4(x22.5^\circ + \varepsilon/2)] = \sin(x90^\circ + 2\varepsilon) = xc_{2\varepsilon}$$

$$s_{4\phi} = 2s_{2\phi}c_{2\phi}$$

$$6 \quad c_{4\phi} = c_{2\phi}^2 - s_{2\phi}^2 = 2c_{2\phi}^2 - 1 = 1 - 2s_{2\phi}^2 \Rightarrow \begin{cases} 1 + c_{4\phi} = 2c_{2\phi}^2 \\ 1 - c_{4\phi} = 2s_{2\phi}^2 \end{cases} \quad (\text{S.12.5})$$

$$1 - \mathbf{c}_{2\varepsilon}^2 W_P = 1 - (1 - \mathbf{s}_{2\varepsilon}^2) W_P = 1 - W_P + \mathbf{s}_{2\varepsilon}^2 W_P = Z_P \mathbf{c}_P + \mathbf{s}_{2\varepsilon}^2 W_P = Z_P \mathbf{c}_P + \mathbf{s}_{2\varepsilon}^2 (1 - Z_P \mathbf{c}_P) \Rightarrow$$

$$1 - \mathbf{c}_{2\varepsilon}^2 W_P = \mathbf{s}_{2\varepsilon}^2 + \mathbf{c}_{2\varepsilon}^2 Z_P \mathbf{c}_P \quad (\text{S.12.6})$$

$$1 - \mathbf{s}_{2\varepsilon}^2 W_P = \mathbf{c}_{2\varepsilon}^2 + \mathbf{s}_{2\varepsilon}^2 Z_P \mathbf{c}_P$$

## 2 S.12.1 Tangent half-angle substitution

3 The substitution Eq. (S.12.1.1) is sometimes called Weierstrass substitution, but it can already  
4 be found in Euler's Institutionum calculi integralis (Eneström number E342: Vol. 1 Part 1,  
5 Sect. 1, Chap. 5, Problem 29, <http://eulerarchive.maa.org/pages/E342.html>).

$$6 \quad t = \tan\left(\frac{\theta}{2}\right) \Leftrightarrow \sin \theta = \frac{2t}{1+t^2} \quad (\text{S.12.1.1})$$

7 With this substitution we can write Eq. (S.12.1.2) and yield  $\varepsilon$  from Eq. (S.12.1.3). For small  $\varepsilon$   
8 we get the approximation Eq. (S.12.1.4).

$$9 \quad t = K \mathbf{s}_{2\varepsilon} = \tan\left(\frac{\theta}{2}\right) \Leftrightarrow \sin \theta = Y = \frac{2K \mathbf{s}_{2\varepsilon}}{1 + (K \mathbf{s}_{2\varepsilon})^2} \quad (\text{S.12.1.2})$$

$$10 \quad \varepsilon = \frac{1}{2} \arcsin \left[ \frac{1}{K} \tan \left( \frac{\arcsin(Y)}{2} \right) \right] \quad (\text{S.12.1.3})$$

$$K < 1 \wedge \varepsilon \ll 1 \Rightarrow$$

$$11 \quad \varepsilon \approx \frac{Y}{2K} \quad (\text{S.12.1.4})$$

1 **S.13 Example**

2 From Eqs. (65) and (61)

3  $F_{11} \propto \eta H_R I_T - H_T I_R$  and  $\delta = \frac{\delta^*(G_T + H_T) - (G_R + H_R)}{(G_R - H_R) - \delta^*(G_T - H_T)}$

4 and the relations

5  $D_R = \frac{T_R^p - T_R^s}{T_R^p + T_R^s}, D_T = \frac{T_T^p - T_T^s}{T_T^p + T_T^s}, T_R = \frac{T_R^p + T_R^s}{2}, T_T = \frac{T_T^p + T_T^s}{2}, T^* = \frac{T_T}{T_R}$  (S.13.1)

6  $1 - D_R = T_R^s / T_R, 1 + D_R = T_R^p / T_R, 1 - D_T = T_T^s / T_T, 1 + D_T = T_T^p / T_T$

7 we get for the simplest case from Eq. (79):

8  $90^\circ$  rotated polarising beam-splitter

with  $y = -1 \Rightarrow \Psi = 90^\circ; G_S = 1, H_S = -D_S \Rightarrow$

9  $\delta = \frac{\delta^* T_T^s - T^* T_R^s}{T^* T_R^p - \delta^* T_T^p}$  (S.13.2)

10  $F_{11} \propto -\eta D_R I_T + D_T I_R = \frac{T_T^p - T_T^s}{T_T^p + T_T^s} I_R - \frac{T_R^p - T_R^s}{T_R^p + T_R^s} \eta I_T$  (S.13.3)

11  $0^\circ$  rotated polarising beam-splitter

with  $y = +1 \Rightarrow \Psi = 0^\circ; G_S = 1, H_S = D_S \Rightarrow$

12  $\delta = \frac{\delta^* T_T^p - T^* T_R^p}{T^* T_R^s - \delta^* T_T^s}$  (S.13.4)

13  $F_{11} \propto \eta D_R I_T - D_T I_R = -\frac{T_T^p - T_T^s}{T_T^p + T_T^s} I_R + \frac{T_R^p - T_R^s}{T_R^p + T_R^s} \eta I_T$  (S.13.5)

14 From Eq. (78) with cleaned  $90^\circ$  rotated polarising beam-splitter  $\Rightarrow$

with  $D_T = 1, D_R = -1 \Rightarrow$

$G_T = 1 + y D_O, G_R = 1 - y D_O,$

15  $H_T = D_O + y = y G_T, H_R = D_O - y = -y G_R$  (S.13.6)

$T_O = \frac{T_O^p + T_O^s}{2}, 1 - D_O = T_O^s / T_O, 1 + D_O = T_O^p / T_O$

$$\delta = \frac{\delta^* (1+y) - \frac{1-yD_O}{1+yD_O} (1-y)}{\frac{1-yD_O}{1+yD_O} (1+y) - \delta^* (1-y)} \quad (\text{S.13.7})$$

1 with  $y = -1 \Rightarrow \delta = \frac{1}{\delta^*} \frac{1+D_O}{1-D_O} = \frac{1}{\delta^*} \frac{T_O^p}{T_O^s}$

with  $y = +1 \Rightarrow \delta = \delta^* \frac{1+D_O}{1-D_O} = \delta^* \frac{T_O^p}{T_O^s}$

$$F_{11} \propto \eta (D_O - y) I_T - (D_O + y) I_R$$

2 with  $y = -1 \Rightarrow F_{11} \propto I_T + \frac{1}{\eta} \frac{1-D_O}{1+D_O} I_R = I_T + \frac{1}{\eta} \frac{T_O^s}{T_O^p} I_R \quad (\text{S.13.8})$

with  $y = +1 \Rightarrow F_{11} \propto I_T + \frac{1}{\eta} \frac{1+D_O}{1-D_O} I_R = I_T + \frac{1}{\eta} \frac{T_O^p}{T_O^s} I_R$

### 3 **S.14 Determination of the degree of circular polarisation of the emitted** 4 **laser beam.**

5 Combining the  $\pm 45^\circ$  calibrations with different calibrators can yield information about the laser  
6 polarisation. With a cleaned analyser, without receiver optics rotation, and with a QWP  
7 without calibrator rotation  $\varepsilon$  before the receiving optics from Chap. (9.2) and a linear polariser  
8 (LP) from Chap. (8.2)

with  $\gamma = \varepsilon = 0, D_T = +1, D_R = -1 \Rightarrow$

9  $\frac{\eta_{QWP}^*}{\eta} = \frac{1-yD_O}{1+yD_O} \frac{i_E + xy(1-2a)v_E}{i_E - xy(1-2a)v_E} \quad (\text{S.14.1})$

$$\frac{\eta_{LP,\Delta 90}^*}{\eta} = \frac{1-yD_O}{1+yD_O}$$

10 we can calculate

11  $Y \equiv \frac{\eta_{QWP}^*(x)}{\eta_{LP,\Delta 90}^*} = \frac{i_E + xy(1-2a)v_E}{i_E - xy(1-2a)v_E} \quad (\text{S.14.2})$

12 and get the degree of circular polarisation

13  $\frac{v_E}{i_E} = \frac{1}{xy(1-2a)} \frac{(Y-1)}{(Y+1)} \quad (\text{S.14.3})$
